# Supplementary material for: Meta-analysis of the effect of expression of MYB transcription factor genes on abiotic stress
Source: PeerJ. 2021 Jun 8;9:e11268. doi: 10.7717/peerj.11268 (PMC8194419; doi:10.7717/peerj.11268)
Supplement: Supplemental Information 2 [file peerj-09-11268-s002.xlsx]

## Sheet: studies
Supporting Information 1. Details on the MYB-overexpression studies used in the meta-analyses, including each of the moderators used for categorical analyses, the transgenic and untransformed control means, sample sizes (n) and the value of the natural log (ln) of the response ratio with corresponding non-parametric variances.
		Moderators																																	EFFECT SIZES
		Transformation			Gene donor		Gene recipient			Drought stress			Low temperature					Salt stress				Experimental conditions	Anthocyanin content (Abs/g FW)						Callus weight (g)						Survival						Germination						Root length
Study No.	Publication	Gene member	Gene number	Promoters	Donor genus	Donor type	Recipient genus	Recipient type	Donor and recipient genus same	Drought stress	Stress severity	Time	Low temperature	Stress severity	Time	Acclimated or not	Acclimated detials	Salt stress	Stress type	Stress severity	Time	Treatment Media	Mean trans	n trans	Mean non-trans	n non-trans	In R level of anthocyanin	variance level of anthocyanin	Mean trans	n trans	Mean non-trans	n non-trans	In R callus weight	variance callus weight	Mean trans	n trans	Mean non-trans	n non-trans	ln R survival	variance survival	Mean trans	n trans	Mean non-trans	n non-trans	ln R germination	variance germination	Mean trans	n trans	Mean non-trans
1	Haifeng Xu.et.al.2018.	MdMYB15L	1	CaMV 35S	Malus domesica Borkh	dicot	Malus domesica Borkh	dicot	Yes				25℃	normal	14 d	other	0d					solid	1.17931	3	1.24138	3	-0.0512933	0.666667	1.9877	3	2.04693	3	-0.029358	0.666667
2	Haifeng Xu.et.al.2018.	MdMYB15L+bHLH33	2	CaMV 35S	Malus domesica Borkh	dicot	Malus domesica Borkh	dicot	Yes				25℃	normal	14 d	other	0d					solid	1.11724	3	1.24138	3	-0.105361	0.666667	2.27459	3	2.04693	3	0.105461	0.666667
3	Haifeng Xu.et.al.2018.	LBSMdMYB15L+bHLH33	2	CaMV 35S	Malus domesica Borkh	dicot	Malus domesica Borkh	dicot	Yes				25℃	normal	14 d	other	0d					solid	1.53621	3	1.24138	3	0.213093	0.666667	2.21311	3	2.04693	3	0.0780622	0.666667
4	Fei Gao et.al.2017	FtMYB9	1	CaMV 35S	Fagopyum Talaricum	dicot	Arabidopsis thaliana	dicot	No	none	none	0 d										solid																			0	50	0	50	0	0.04
5	Fei Gao et.al.2017	FtMYB9	1	CaMV 35S	Fagopyum Talaricum	dicot	Arabidopsis thaliana	dicot	No	none	none	1 d										solid																			0	50	0	50	0	0.04
6	Fei Gao et.al.2017	FtMYB9	1	CaMV 35S	Fagopyum Talaricum	dicot	Arabidopsis thaliana	dicot	No	none	none	2 d										solid																			55.5911	50	97.7636	50	-0.56453	0.04
7	Fei Gao et.al.2017	FtMYB9	1	CaMV 35S	Fagopyum Talaricum	dicot	Arabidopsis thaliana	dicot	No	none	none	3 d										solid																			97.8914	50	100.064	50	-0.0219505	0.04
8	Fei Gao et.al.2017	FtMYB9	1	CaMV 35S	Fagopyum Talaricum	dicot	Arabidopsis thaliana	dicot	No	none	none	4 d										solid																			100.192	50	100.064	50	0.00127632	0.04
9	Fei Gao et.al.2017	FtMYB9	1	CaMV 35S	Fagopyum Talaricum	dicot	Arabidopsis thaliana	dicot	No	none	none	5 d										solid																			100.064	50	100.064	50	0	0.04
10	Fei Gao et.al.2017	FtMYB9	1	CaMV 35S	Fagopyum Talaricum	dicot	Arabidopsis thaliana	dicot	No	none	none	6 d										solid																			100.064	50	100.064	50	0	0.04
11	Fei Gao et.al.2017	FtMYB9	1	CaMV 35S	Fagopyum Talaricum	dicot	Arabidopsis thaliana	dicot	No	none	none	7 d										solid																			100.064	50	100.064	50	0	0.04
12	Fei Gao et.al.2017	FtMYB9	1	CaMV 35S	Fagopyum Talaricum	dicot	Arabidopsis thaliana	dicot	No									150 mM	NaCl	medium	0 d	solid																			0	50	0	50	0	0.04
13	Fei Gao et.al.2017	FtMYB9	1	CaMV 35S	Fagopyum Talaricum	dicot	Arabidopsis thaliana	dicot	No									150 mM	NaCl	medium	1 d	solid																			0	50	0	50	0	0.04
14	Fei Gao et.al.2017	FtMYB9	1	CaMV 35S	Fagopyum Talaricum	dicot	Arabidopsis thaliana	dicot	No									150 mM	NaCl	medium	2 d	solid																			0	50	0	50	0	0.04
15	Fei Gao et.al.2017	FtMYB9	1	CaMV 35S	Fagopyum Talaricum	dicot	Arabidopsis thaliana	dicot	No									150 mM	NaCl	medium	3 d	solid																			15.7962	50	0	50	0	0.04
16	Fei Gao et.al.2017	FtMYB9	1	CaMV 35S	Fagopyum Talaricum	dicot	Arabidopsis thaliana	dicot	No									150 mM	NaCl	medium	4 d	solid																			53.8854	50	9.17197	50	1.77071	0.04
17	Fei Gao et.al.2017	FtMYB9	1	CaMV 35S	Fagopyum Talaricum	dicot	Arabidopsis thaliana	dicot	No									150 mM	NaCl	medium	5 d	solid																			85.7325	50	55.0318	50	0.44332	0.04
18	Fei Gao et.al.2017	FtMYB9	1	CaMV 35S	Fagopyum Talaricum	dicot	Arabidopsis thaliana	dicot	No									150 mM	NaCl	medium	6 d	solid																			88.9172	50	59.6178	50	0.399751	0.04
19	Fei Gao et.al.2017	FtMYB9	1	CaMV 35S	Fagopyum Talaricum	dicot	Arabidopsis thaliana	dicot	No									150 mM	NaCl	medium	7 d	solid																			89.2994	50	60.7643	50	0.384991	0.04
20	Fei Gao et.al.2017	FtMYB9	1	CaMV 35S	Fagopyum Talaricum	dicot	Arabidopsis thaliana	dicot	No	none	none	7 d										solid																									3.54258	3	3.38686
21	Fei Gao et.al.2017	FtMYB9	1	CaMV 35S	Fagopyum Talaricum	dicot	Arabidopsis thaliana	dicot	No									150 mM	NaCl	medium	7 d	solid																									1.64477	3	0.875912
22	Fei Gao et.al.2017	FtMYB9	1	CaMV 35S	Fagopyum Talaricum	dicot	Arabidopsis thaliana	dicot	No	300 mM mannitol	mannitol	7 d										solid																									2.29684	3	0.788321
23	Fei Gao et.al.2017	FtMYB9	1	CaMV 35S	Fagopyum Talaricum	dicot	Arabidopsis thaliana	dicot	No	none	none	25 d										soil
24	Fei Gao et.al.2017	FtMYB9	1	CaMV 35S	Fagopyum Talaricum	dicot	Arabidopsis thaliana	dicot	No	without watering	drought	25 d										soil													0.851572	20	0.101887	20	2.12322	0.1
25	Fei Gao et.al.2017	FtMYB9	1	CaMV 35S	Fagopyum Talaricum	dicot	Arabidopsis thaliana	dicot	No									400 mM	NaCl	high	15 d	soil													0.867925	20	0.2	20	1.46779	0.1
26	Fei Gao et.al.2017	FtMYB9	1	CaMV 35S	Fagopyum Talaricum	dicot	Arabidopsis thaliana	dicot	No	without watering	drought	0 min
27	Fei Gao et.al.2017	FtMYB9	1	CaMV 35S	Fagopyum Talaricum	dicot	Arabidopsis thaliana	dicot	No	without watering	drought	30 min
28	Fei Gao et.al.2017	FtMYB9	1	CaMV 35S	Fagopyum Talaricum	dicot	Arabidopsis thaliana	dicot	No	without watering	drought	60 min
29	Fei Gao et.al.2017	FtMYB9	1	CaMV 35S	Fagopyum Talaricum	dicot	Arabidopsis thaliana	dicot	No	without watering	drought	90 min
30	Fei Gao et.al.2017	FtMYB9	1	CaMV 35S	Fagopyum Talaricum	dicot	Arabidopsis thaliana	dicot	No	without watering	drought	120 min
31	Fei Gao et.al.2017	FtMYB9	1	CaMV 35S	Fagopyum Talaricum	dicot	Arabidopsis thaliana	dicot	No	without watering	drought	150 min
32	Fei Gao et.al.2017	FtMYB9	1	CaMV 35S	Fagopyum Talaricum	dicot	Arabidopsis thaliana	dicot	No	without watering	drought	180 min
33	Xuming Yin et.al.2017	OsMYBR1	1	CaMV 35S	Oryza sativa	monocot	Oryza sativa	monocot	YES	without watering	drought	7 d										mix													0.433992	6	0.182609	6	0.865681	0.333333
34	Xuming Yin et.al.2017	OsMYBR1	1	CaMV 35S	Oryza sativa	monocot	Oryza sativa	monocot	YES	none	none	4 d										solid
35	Xuming Yin et.al.2017	OsMYBR1	1	CaMV 35S	Oryza sativa	monocot	Oryza sativa	monocot	YES	without watering	drought	4 d										solid
36	Yan Wang et al.2017	ZmMYB48	1	CaMV 35S	Zea mays	monocot	Arabidopsis thaliana	dicot	No	none	none	12 d										solid
37	Yan Wang et al.2017	ZmMYB48	1	CaMV 35S	Zea mays	monocot	Arabidopsis thaliana	dicot	No	without watering	drought	12 d										solid													64.9376	3	32.0461	3	0.70625	0.666667
38	Yong-Tao Yu et al.2016	MYB37	1	CaMV 35S	Arabidopsis thaliana	dicot	Arabidopsis thaliana	dicot	Yes	without watering	drought	0 h										solid																				0	100	0	100
39	Yong-Tao Yu et al.2016	MYB37	1	CaMV 35S	Arabidopsis thaliana	dicot	Arabidopsis thaliana	dicot	Yes	without watering	drought	1 h										solid
40	Yong-Tao Yu et al.2016	MYB37	1	CaMV 35S	Arabidopsis thaliana	dicot	Arabidopsis thaliana	dicot	Yes	without watering	drought	2 h										solid
41	Yong-Tao Yu et al.2016	MYB37	1	CaMV 35S	Arabidopsis thaliana	dicot	Arabidopsis thaliana	dicot	Yes	without watering	drought	3 h										solid
42	Yong-Tao Yu et al.2016	MYB37	1	CaMV 35S	Arabidopsis thaliana	dicot	Arabidopsis thaliana	dicot	Yes	without watering	drought	4 h										solid
43	Yong-Tao Yu et al.2016	MYB37	1	CaMV 35S	Arabidopsis thaliana	dicot	Arabidopsis thaliana	dicot	Yes	without watering	drought	5 h										solid
44	Yong-Tao Yu et al.2016	MYB37	1	CaMV 35S	Arabidopsis thaliana	dicot	Arabidopsis thaliana	dicot	Yes	without watering	drought	6 h										solid
45	Yong-Tao Yu et al.2016	MYB37	1	CaMV 35S	Arabidopsis thaliana	dicot	Arabidopsis thaliana	dicot	Yes	without watering	drought	14 d										soil													63.7427	3	32.7485	3	0.665996	0.666667
46	Haiyan Xiong et al.2014	OsMYB48-1	1	CaMV 35S	Oryza sativa	monocot	Oryza sativa	monocot	Yes	200mM	mannitol	10 d										solid
47	Haiyan Xiong et al.2014	OsMYB48-1	1	CaMV 35S	Oryza sativa	monocot	Oryza sativa	monocot	Yes									150 mM NaCl	NaCl	medium	10 d	solid
48	Haiyan Xiong et al.2014	OsMYB48-1	1	CaMV 35S	Oryza sativa	monocot	Oryza sativa	monocot	Yes	0.2	PEG6000	3 d										liquid													89.7849	3	57.7957	3	0.440503	0.666667
49	Haiyan Xiong et al.2014	OsMYB48-1	1	CaMV 35S	Oryza sativa	monocot	Oryza sativa	monocot	Yes	without watering	drought	7 d										soil													54.5699	20	15.3226	20	1.27015	0.1
50	Haiyan Xiong et al.2014	OsMYB48-1	1	CaMV 35S	Oryza sativa	monocot	Oryza sativa	monocot	Yes	without watering	drought	0 h										soil
51	Haiyan Xiong et al.2014	OsMYB48-1	1	CaMV 35S	Oryza sativa	monocot	Oryza sativa	monocot	Yes	without watering	drought	1 h										soil
52	Haiyan Xiong et al.2014	OsMYB48-1	1	CaMV 35S	Oryza sativa	monocot	Oryza sativa	monocot	Yes	without watering	drought	2 h										soil
53	Haiyan Xiong et al.2014	OsMYB48-1	1	CaMV 35S	Oryza sativa	monocot	Oryza sativa	monocot	Yes	without watering	drought	3 h										soil
54	Haiyan Xiong et al.2014	OsMYB48-1	1	CaMV 35S	Oryza sativa	monocot	Oryza sativa	monocot	Yes	without watering	drought	4 h										soil
55	Haiyan Xiong et al.2014	OsMYB48-1	1	CaMV 35S	Oryza sativa	monocot	Oryza sativa	monocot	Yes	without watering	drought	5 h										soil
56	Haiyan Xiong et al.2014	OsMYB48-1	1	CaMV 35S	Oryza sativa	monocot	Oryza sativa	monocot	Yes	without watering	drought	6 h										soil
57	Haiyan Xiong et al.2014	OsMYB48-1	1	CaMV 35S	Oryza sativa	monocot	Oryza sativa	monocot	Yes	without watering	drought	7 h										soil
58	Haiyan Xiong et al.2014	OsMYB48-1	1	CaMV 35S	Oryza sativa	monocot	Oryza sativa	monocot	Yes	none	none	5 d
59	Haiyan Xiong et al.2014	OsMYB48-1	1	CaMV 35S	Oryza sativa	monocot	Oryza sativa	monocot	Yes	without watering	drought	5 d
60	Yuxiang Qin et al.2012	TaMYB33	1	CaMV 35S	Triticum aestivum	monocot	Arabidopsis thaliana	dicot	No	none	none	10 d										solid																									2.18662	3	2.19718
61	Yuxiang Qin et al.2012	TaMYB33	1	CaMV 35S	Triticum aestivum	monocot	Arabidopsis thaliana	dicot	No									50 mM NaCl	NaCl	low	10 d	solid																									1.91434	3	1.57343
62	Yuxiang Qin et al.2012	TaMYB33	1	CaMV 35S	Triticum aestivum	monocot	Arabidopsis thaliana	dicot	No	50 mM	mannitol	10 d										solid																									2.21329	3	1.86713
63	Yuxiang Qin et al.2012	TaMYB33	1	CaMV 35S	Triticum aestivum	monocot	Arabidopsis thaliana	dicot	No									10 mM LiCl	LiCl	low	10 d	solid																									1.67517	3	1.59864
64	Yuxiang Qin et al.2012	TaMYB33	1	CaMV 35S	Triticum aestivum	monocot	Arabidopsis thaliana	dicot	No									100 mM KCl	KCl	medium	10 d	solid																									1.69828	3	1.74138
65	Im, Ju Sung et al.2012	StMYB1R-1	1	CaMV 35S	Solanum tuberosum	dicot	Solanum tuberosum	dicot	YES	without watering	none	4 d										soil
66	Im, Ju Sung et al.2012	StMYB1R-1	1	CaMV 35S	Solanum tuberosum	dicot	Solanum tuberosum	dicot	YES	without watering	drought	10 d										soil
67	Im, Ju Sung et al.2012	StMYB1R-1	1	CaMV 35S	Solanum tuberosum	dicot	Solanum tuberosum	dicot	YES	without watering	drought	15 d										soil
68	Park, Min Young et al.2012	AtMYB52	1	CaMV 35S	Arabidopsis thaliana	dicot	Arabidopsis thaliana	dicot	Yes	without watering	drought	11 d										soil													66.2857	20	11.4286	20	1.75786	0.1
69	Park, Min Young et al.2012	AtMYB52	1	CaMV 35S	Arabidopsis thaliana	dicot	Arabidopsis thaliana	dicot	Yes	without watering	drought	16 d										soil													76.8383	20	4.7377	20	2.78615	0.1
70	Xiaoyan Dai et al.2007	OsMYB3R-2	1	CaMV 35S	Oryza sativa	monocot	Arabidopsis thaliana	dicot	No				-8℃	freezing	10 h	other	0d					soil													68.5417	3	26.875	3	0.936245	0.666667
71	Xiaoyan Dai et al.2007	OsMYB3R-2	1	CaMV 35S	Oryza sativa	monocot	Arabidopsis thaliana	dicot	No				-2℃	freezing	10 h	other	0d					soil													100	3	100	3	0	0.666667
72	Xiaoyan Dai et al.2007	OsMYB3R-2	1	CaMV 35S	Oryza sativa	monocot	Arabidopsis thaliana	dicot	No				-4℃	freezing	10 h	other	0d					soil													100.667	3	85.3333	3	0.16525	0.666667
73	Xiaoyan Dai et al.2007	OsMYB3R-2	1	CaMV 35S	Oryza sativa	monocot	Arabidopsis thaliana	dicot	No				-6℃	freezing	10 h	other	0d					soil													93.3333	3	38.6667	3	0.881199	0.666667
74	Xiaoyan Dai et al.2007	OsMYB3R-2	1	CaMV 35S	Oryza sativa	monocot	Arabidopsis thaliana	dicot	No				-8℃	freezing	10 h	other	0d					soil													69.7778	3	25.3333	3	1.01319	0.666667
75	Xiaoyan Dai et al.2007	OsMYB3R-2	1	CaMV 35S	Oryza sativa	monocot	Arabidopsis thaliana	dicot	No				-10℃	freezing	10 h	other	0d					soil													47.5556	3	6	3	2.07014	0.666667
76	Xiaoyan Dai et al.2007	OsMYB3R-2	1	CaMV 35S	Oryza sativa	monocot	Arabidopsis thaliana	dicot	No	none	none	0 min										soil
77	Xiaoyan Dai et al.2007	OsMYB3R-2	1	CaMV 35S	Oryza sativa	monocot	Arabidopsis thaliana	dicot	No	without watering	drought	20 min										soil
78	Xiaoyan Dai et al.2007	OsMYB3R-2	1	CaMV 35S	Oryza sativa	monocot	Arabidopsis thaliana	dicot	No	without watering	drought	40 min										soil
79	Xiaoyan Dai et al.2007	OsMYB3R-2	1	CaMV 35S	Oryza sativa	monocot	Arabidopsis thaliana	dicot	No	without watering	drought	60 min										soil
80	Xiaoyan Dai et al.2007	OsMYB3R-2	1	CaMV 35S	Oryza sativa	monocot	Arabidopsis thaliana	dicot	No	without watering	drought	80 min										soil
81	Xiaoyan Dai et al.2007	OsMYB3R-2	1	CaMV 35S	Oryza sativa	monocot	Arabidopsis thaliana	dicot	No	without watering	drought	100 min										soil
82	Xiaoyan Dai et al.2007	OsMYB3R-2	1	CaMV 35S	Oryza sativa	monocot	Arabidopsis thaliana	dicot	No	without watering	drought	120 min										soil
83	Xiaoyan Dai et al.2007	OsMYB3R-2	1	CaMV 35S	Oryza sativa	monocot	Arabidopsis thaliana	dicot	No	without watering	drought	140 min										soil
84	Xiaoyan Dai et al.2007	OsMYB3R-2	1	CaMV 35S	Oryza sativa	monocot	Arabidopsis thaliana	dicot	No	without watering	drought	160 min										soil
85	Xiaoyan Dai et al.2007	OsMYB3R-2	1	CaMV 35S	Oryza sativa	monocot	Arabidopsis thaliana	dicot	No	without watering	drought	180 min										soil
86	Xiaoyan Dai et al.2007	OsMYB3R-2	1	CaMV 35S	Oryza sativa	monocot	Arabidopsis thaliana	dicot	No	without watering	drought	14 d										soil													93.8889	60	26.7	60	1.25745	0.0333333
87	Xiaoyan Dai et al.2007	OsMYB3R-2	1	CaMV 35S	Oryza sativa	monocot	Arabidopsis thaliana	dicot	No									0 mM	NaCl		7 d	solid																									2.69082	3	2.7971
88	Xiaoyan Dai et al.2007	OsMYB3R-2	1	CaMV 35S	Oryza sativa	monocot	Arabidopsis thaliana	dicot	No									75 mM	NaCl	low	7 d	solid																									2.43478	3	1.18841
89	Xiaoyan Dai et al.2007	OsMYB3R-2	1	CaMV 35S	Oryza sativa	monocot	Arabidopsis thaliana	dicot	No									100 mM	NaCl	medium	7 d	solid																									2.11111	3	1.04348
90	Xiaoyan Dai et al.2007	OsMYB3R-2	1	CaMV 35S	Oryza sativa	monocot	Arabidopsis thaliana	dicot	No									150 mM	NaCl	medium	7 d	solid																									1.28019	3	0.347826
91	Xiaoyan Dai et al.2007	OsMYB3R-2	1	CaMV 35S	Oryza sativa	monocot	Arabidopsis thaliana	dicot	No	none	none	1 d										solid																			0	50	0	50	0	0.04
92	Xiaoyan Dai et al.2007	OsMYB3R-2	1	CaMV 35S	Oryza sativa	monocot	Arabidopsis thaliana	dicot	No	none	none	2 d										solid																			85.9213	50	90.0621	50	-0.0470675	0.04
93	Xiaoyan Dai et al.2007	OsMYB3R-2	1	CaMV 35S	Oryza sativa	monocot	Arabidopsis thaliana	dicot	No	none	none	3 d										solid																			100	50	100	50	0	0.04
94	Xiaoyan Dai et al.2007	OsMYB3R-2	1	CaMV 35S	Oryza sativa	monocot	Arabidopsis thaliana	dicot	No	none	none	4 d										solid																			100	50	100	50	0	0.04
95	Xiaoyan Dai et al.2007	OsMYB3R-2	1	CaMV 35S	Oryza sativa	monocot	Arabidopsis thaliana	dicot	No	none	none	5 d										solid																			100	50	100	50	0	0.04
96	Xiaoyan Dai et al.2007	OsMYB3R-2	1	CaMV 35S	Oryza sativa	monocot	Arabidopsis thaliana	dicot	No	none	none	6 d										solid																			100	50	100	50	0	0.04
97	Xiaoyan Dai et al.2007	OsMYB3R-2	1	CaMV 35S	Oryza sativa	monocot	Arabidopsis thaliana	dicot	No									50 mM	NaCl	low	1 d	solid																			0	50	0	50	0	0.04
98	Xiaoyan Dai et al.2007	OsMYB3R-2	1	CaMV 35S	Oryza sativa	monocot	Arabidopsis thaliana	dicot	No									50 mM	NaCl	low	2 d	solid																			83.7246	50	34.7418	50	0.879589	0.04
99	Xiaoyan Dai et al.2007	OsMYB3R-2	1	CaMV 35S	Oryza sativa	monocot	Arabidopsis thaliana	dicot	No									50 mM	NaCl	low	3 d	solid																			95.9311	50	54.9296	50	0.557579	0.04
100	Xiaoyan Dai et al.2007	OsMYB3R-2	1	CaMV 35S	Oryza sativa	monocot	Arabidopsis thaliana	dicot	No									50 mM	NaCl	low	4 d	solid																			98.2786	50	62.4413	50	0.453579	0.04
101	Xiaoyan Dai et al.2007	OsMYB3R-2	1	CaMV 35S	Oryza sativa	monocot	Arabidopsis thaliana	dicot	No									50 mM	NaCl	low	5 d	solid																			100	50	69.9531	50	0.357346	0.04
102	Xiaoyan Dai et al.2007	OsMYB3R-2	1	CaMV 35S	Oryza sativa	monocot	Arabidopsis thaliana	dicot	No									75 mM	NaCl	low	1 d	solid																			0	50	0	50	0	0.04
103	Xiaoyan Dai et al.2007	OsMYB3R-2	1	CaMV 35S	Oryza sativa	monocot	Arabidopsis thaliana	dicot	No									75 mM	NaCl	low	2 d	solid																			0	50	0	50	0	0.04
104	Xiaoyan Dai et al.2007	OsMYB3R-2	1	CaMV 35S	Oryza sativa	monocot	Arabidopsis thaliana	dicot	No									75 mM	NaCl	low	3 d	solid																			63.1498	50	37.156	50	0.530386	0.04
105	Xiaoyan Dai et al.2007	OsMYB3R-2	1	CaMV 35S	Oryza sativa	monocot	Arabidopsis thaliana	dicot	No									75 mM	NaCl	low	4 d	solid																			79.5107	50	48.1651	50	0.501256	0.04
106	Xiaoyan Dai et al.2007	OsMYB3R-2	1	CaMV 35S	Oryza sativa	monocot	Arabidopsis thaliana	dicot	No									75 mM	NaCl	low	5 d	solid																			90.367	50	55.0459	50	0.495712	0.04
107	Chan Young Jeong et al.2018	AtMYBL-O	1	CaMV 35S	Arabidopsis thaliana	dicot	Arabidopsis thaliana	dicot	Yes	none	none	3 d										solid																			92.8571	3	97.2222	3	-0.0459371	0.666667
108	Chan Young Jeong et al.2018	AtMYBL-O	1	CaMV 35S	Arabidopsis thaliana	dicot	Arabidopsis thaliana	dicot	Yes	none	none	4 d										solid																			96.0317	3	97.2222	3	-0.0123205	0.666667
109	Chan Young Jeong et al.2018	AtMYBL-O	1	CaMV 35S	Arabidopsis thaliana	dicot	Arabidopsis thaliana	dicot	Yes	none	none	5 d										solid																			96.8254	3	97.2222	3	-0.00408999	0.666667
110	Chan Young Jeong et al.2018	AtMYBL-O	1	CaMV 35S	Arabidopsis thaliana	dicot	Arabidopsis thaliana	dicot	Yes	none	none	6 d										solid																			97.2222	3	97.619	3	-0.00407333	0.666667
111	Chan Young Jeong et al.2018	AtMYBL-O	1	CaMV 35S	Arabidopsis thaliana	dicot	Arabidopsis thaliana	dicot	Yes	none	none	7 d										solid																			97.619	3	98.0159	3	-0.0040568	0.666667
112	Chan Young Jeong et al.2018	AtMYBL-O	1	CaMV 35S	Arabidopsis thaliana	dicot	Arabidopsis thaliana	dicot	Yes	none	none	8 d										solid																			97.8175	3	98.0159	3	-0.00202634	0.666667
113	Chan Young Jeong et al.2018	AtMYBL-O	1	CaMV 35S	Arabidopsis thaliana	dicot	Arabidopsis thaliana	dicot	Yes									200 mM	NaCl	medium	3 d	solid																			1.1811	3	4.72441	3	-1.38629	0.666667
114	Chan Young Jeong et al.2018	AtMYBL-O	1	CaMV 35S	Arabidopsis thaliana	dicot	Arabidopsis thaliana	dicot	Yes									200 mM	NaCl	medium	4 d	solid																			7.48031	3	9.84252	3	-0.274437	0.666667
115	Chan Young Jeong et al.2018	AtMYBL-O	1	CaMV 35S	Arabidopsis thaliana	dicot	Arabidopsis thaliana	dicot	Yes									200 mM	NaCl	medium	5 d	solid																			22.0472	3	12.2047	3	0.591364	0.666667
116	Chan Young Jeong et al.2018	AtMYBL-O	1	CaMV 35S	Arabidopsis thaliana	dicot	Arabidopsis thaliana	dicot	Yes									200 mM	NaCl	medium	6 d	solid																			30.9055	3	19.2913	3	0.471278	0.666667
117	Chan Young Jeong et al.2018	AtMYBL-O	1	CaMV 35S	Arabidopsis thaliana	dicot	Arabidopsis thaliana	dicot	Yes									200 mM	NaCl	medium	7 d	solid																			39.7638	3	21.2598	3	0.626136	0.666667
118	Chan Young Jeong et al.2018	AtMYBL-O	1	CaMV 35S	Arabidopsis thaliana	dicot	Arabidopsis thaliana	dicot	Yes									200 mM	NaCl	medium	8 d	solid																			41.5354	3	22.4409	3	0.61566	0.666667
119	Chan Young Jeong et al.2018	AtMYBL-O	1	CaMV 35S	Arabidopsis thaliana	dicot	Arabidopsis thaliana	dicot	Yes									none	none		14 d	solid																									9.2067	15	9.51955
120	Chan Young Jeong et al.2018	AtMYBL-O	1	CaMV 35S	Arabidopsis thaliana	dicot	Arabidopsis thaliana	dicot	Yes									100 mM	NaCl	medium	14 d	solid																									5.2514	15	6.43575
121	Chan Young Jeong et al.2018	AtMYBL-O	1	CaMV 35S	Arabidopsis thaliana	dicot	Arabidopsis thaliana	dicot	Yes									150 mM	NaCl	medium	14 d	solid																									1.60894	15	2.88268
122	Chan Young Jeong et al.2018	AtMYBL-O	1	CaMV 35S	Arabidopsis thaliana	dicot	Arabidopsis thaliana	dicot	Yes	200 mM	mannitol	14 d										solid																									3.97765	15	7.30726
123	Chan Young Jeong et al.2018	AtMYBL-O	1	CaMV 35S	Arabidopsis thaliana	dicot	Arabidopsis thaliana	dicot	Yes	300 mM	mannitol	14 d										solid																									1.78771	15	3.41899
124	Chan Young Jeong et al.2018	AtMYBL-O	1	CaMV 35S	Arabidopsis thaliana	dicot	Arabidopsis thaliana	dicot	Yes	none	none	30 d										soil
125	Yuxuan He et al.2018	GmMYB3a	1	CaMV 35S	Glycine max (L.)	dicot	Glycine max (L.)	dicot	Yes	none	none	10 d										solid
126	Yuxuan He et al.2018	GmMYB3a	1	CaMV 35S	Glycine max (L.)	dicot	Glycine max (L.)	dicot	Yes									200 mM	NaCl	medium	10 d	solid
127	X.W.Li et al.2016	GmMYB12B2	1	CaMV 35S	Glycine max	dicot	Arabidopsis thaliana	dicot	No									none	none		7 d	liquid																			99.1837	100	97.9592	100	0.0124225	0.02
128	X.W.Li et al.2016	GmMYB12B2	1	CaMV 35S	Glycine max	dicot	Arabidopsis thaliana	dicot	No									50 mM	NaCl	low	7 d	liquid																			98.6939	100	97.4694	100	0.0124846	0.02
129	X.W.Li et al.2016	GmMYB12B2	1	CaMV 35S	Glycine max	dicot	Arabidopsis thaliana	dicot	No									100 mM	NaCl	medium	7 d	liquid																			56.3265	100	38.6939	100	0.375484	0.02
130	X.W.Li et al.2016	GmMYB12B2	1	CaMV 35S	Glycine max	dicot	Arabidopsis thaliana	dicot	No									150 mM	NaCl	medium	7 d	liquid																			15.6735	100	5.38776	100	1.06784	0.02
131	Tian Li,et al.2016	FvMYB1	1	CaMV 35S	Fraxinus velutina Torr	dicot	Nicotianatabacum	dicot	No									none	none		10 d	solid																									1.94628	3	2.03306
132	Tian Li,et al.2016	FvMYB1	1	CaMV 35S	Fraxinus velutina Torr	dicot	Nicotianatabacum	dicot	No									50 mM	NaCl	medium	10 d	solid																									1.59504	3	1.57438
133	Tian Li,et al.2016	FvMYB1	1	CaMV 35S	Fraxinus velutina Torr	dicot	Nicotianatabacum	dicot	No									100 mM	NaCl	medium	10 d	solid																									1.28926	3	0.880165
134	Tian Li,et al.2016	FvMYB1	1	CaMV 35S	Fraxinus velutina Torr	dicot	Nicotianatabacum	dicot	No									150 mM	NaCl	medium	10 d	solid																									0.975207	3	0.644628
135	Tian Li,et al.2016	FvMYB1	1	CaMV 35S	Fraxinus velutina Torr	dicot	Nicotianatabacum	dicot	No									200 mM	NaCl	medium	10 d	solid																									0.491736	3	0.173554
136	Tian Li,et al.2016	FvMYB1	1	CaMV 35S	Fraxinus velutina Torr	dicot	Nicotianatabacum	dicot	No									250 mM	NaCl	high	10 d	solid																									0.260331	3	0.0991736
137	Tian Li,et al.2016	FvMYB1	1	CaMV 35S	Fraxinus velutina Torr	dicot	Nicotiana tabacum	dicot	No									200 mM	NaCl	medium	48 h	solid
138	Pushp Sheel Shukla,et al.2015	SbMYB15	1	CaMV 35S	Salicornia brachiata	dicot	Nicotiana tabacum	dicot	No									0 mM	none		14 d	mix																									11.5867	3	9.75
139	Pushp Sheel Shukla,et al.2015	SbMYB15	1	CaMV 35S	Salicornia brachiata	dicot	Nicotiana tabacum	dicot	No									100 mM	NaCl	medium	14 d	mix																									10.4167	3	7.75
140	Pushp Sheel Shukla,et al.2015	SbMYB15	1	CaMV 35S	Salicornia brachiata	dicot	Nicotiana tabacum	dicot	No									200 mM	NaCl	medium	14 d	mix																									7.29667	3	5.38
141	Pushp Sheel Shukla,et al.2015	SbMYB15	1	CaMV 35S	Salicornia brachiata	dicot	Nicotiana tabacum	dicot	No	0	none	7 d										mix																									17.22	3	14.17
142	Pushp Sheel Shukla,et al.2015	SbMYB15	1	CaMV 35S	Salicornia brachiata	dicot	Nicotiana tabacum	dicot	No	0.1	PEG6000	7 d										mix																									13.0767	3	11.33
143	Pushp Sheel Shukla,et al.2015	SbMYB15	1	CaMV 35S	Salicornia brachiata	dicot	Nicotiana tabacum	dicot	No	none	none	0 d										soil
144	Pushp Sheel Shukla,et al.2015	SbMYB15	1	CaMV 35S	Salicornia brachiata	dicot	Nicotiana tabacum	dicot	No									0 mM	NaCl		0 d	soil
145	Pushp Sheel Shukla,et al.2015	SbMYB15	1	CaMV 35S	Salicornia brachiata	dicot	Nicotiana tabacum	dicot	No	none	none	7 d										soil
146	Pushp Sheel Shukla,et al.2015	SbMYB15	1	CaMV 35S	Salicornia brachiata	dicot	Nicotiana tabacum	dicot	No									50 mM	NaCl	low	7 d	soil
147	Pushp Sheel Shukla,et al.2015	SbMYB15	1	CaMV 35S	Salicornia brachiata	dicot	Nicotiana tabacum	dicot	No	none	none	7 d										soil
148	Pushp Sheel Shukla,et al.2015	SbMYB15	1	CaMV 35S	Salicornia brachiata	dicot	Nicotiana tabacum	dicot	No									100 mM	NaCl	medium	7 d	soil
149	Pushp Sheel Shukla,et al.2015	SbMYB15	1	CaMV 35S	Salicornia brachiata	dicot	Nicotiana tabacum	dicot	No	none	none	7 d										soil
150	Pushp Sheel Shukla,et al.2015	SbMYB15	1	CaMV 35S	Salicornia brachiata	dicot	Nicotiana tabacum	dicot	No									200 mM	NaCl	medium	7 d	soil
151	Pushp Sheel Shukla,et al.2015	SbMYB15	1	CaMV 35S	Salicornia brachiata	dicot	Nicotiana tabacum	dicot	No	none	none	14 d										soil
152	Pushp Sheel Shukla,et al.2015	SbMYB15	1	CaMV 35S	Salicornia brachiata	dicot	Nicotiana tabacum	dicot	No									0 mM	NaCl		14 d	soil
153	Linjie Qi,et al.2015	SbMYB2	1	CaMV 35S	Scutellaria baicalensis	monocot	Nicotiana tabacum	dicot	No	none	none	3 d										solid																									0.230769	10	0.228571
154	Linjie Qi,et al.2015	SbMYB2	1	CaMV 35S	Scutellaria baicalensis	monocot	Nicotiana tabacum	dicot	No									150 mM	NaCl	medium	3 d	solid																									0.769231	10	0.257143
155	Linjie Qi,et al.2015	SbMYB2	1	CaMV 35S	Scutellaria baicalensis	monocot	Nicotiana tabacum	dicot	No	0.2 M	mannitol	3 d										solid																									0.324786	10	0.47619
156	Linjie Qi,et al.2015	SbMYB7	1	CaMV 35S	Scutellaria baicalensis	monocot	Nicotiana tabacum	dicot	No	none	none	3 d										solid																									0.27907	10	0.228571
157	Linjie Qi,et al.2015	SbMYB7	1	CaMV 35S	Scutellaria baicalensis	monocot	Nicotiana tabacum	dicot	No									150 mM	NaCl	medium	3 d	solid																									0.534884	10	0.257143
158	Linjie Qi,et al.2015	SbMYB7	1	CaMV 35S	Scutellaria baicalensis	monocot	Nicotiana tabacum	dicot	No	0.2 M	mannitol	3 d										solid																									0.310078	10	0.47619
159	Linjie Qi,et al.2015	SbMYB2	1	CaMV 35S	Scutellaria baicalensis	monocot	Nicotiana tabacum	dicot	No	none	none	6 d										solid																									0.367521	10	0.485714
160	Linjie Qi,et al.2015	SbMYB2	1	CaMV 35S	Scutellaria baicalensis	monocot	Nicotiana tabacum	dicot	No									150 mM	NaCl	medium	6 d	solid																									0.307692	10	0.352381
161	Linjie Qi,et al.2015	SbMYB2	1	CaMV 35S	Scutellaria baicalensis	monocot	Nicotiana tabacum	dicot	No	0.2 M	mannitol	6 d										solid																									0.247863	10	0.228571
162	Linjie Qi,et al.2015	SbMYB7	1	CaMV 35S	Scutellaria baicalensis	monocot	Nicotiana tabacum	dicot	No	none	none	6 d										solid																									0.612403	10	0.485714
163	Linjie Qi,et al.2015	SbMYB7	1	CaMV 35S	Scutellaria baicalensis	monocot	Nicotiana tabacum	dicot	No									150 mM	NaCl	medium	6 d	solid																									0.604651	10	0.352381
164	Linjie Qi,et al.2015	SbMYB7	1	CaMV 35S	Scutellaria baicalensis	monocot	Nicotiana tabacum	dicot	No	0.2 M	mannitol	6 d										solid																									0.333333	10	0.228571
165	Linjie Qi,et al.2015	SbMYB2	1	CaMV 35S	Scutellaria baicalensis	monocot	Nicotiana tabacum	dicot	No	none	none	9d										solid																									0.820513	10	0.990476
166	Linjie Qi,et al.2015	SbMYB2	1	CaMV 35S	Scutellaria baicalensis	monocot	Nicotiana tabacum	dicot	No									150 mM	NaCl	medium	9 d	solid																									0.735043	10	0.390476
167	Linjie Qi,et al.2015	SbMYB2	1	CaMV 35S	Scutellaria baicalensis	monocot	Nicotiana tabacum	dicot	No	0.2 M	mannitol	9 d										solid																									0.632479	10	0.514286
168	Linjie Qi,et al.2015	SbMYB7	1	CaMV 35S	Scutellaria baicalensis	monocot	Nicotiana tabacum	dicot	No	none	none	9 d										solid																									0.782946	10	0.990476
169	Linjie Qi,et al.2015	SbMYB7	1	CaMV 35S	Scutellaria baicalensis	monocot	Nicotiana tabacum	dicot	No									150 mM	NaCl	medium	9 d	solid																									0.503876	10	0.390476
170	Linjie Qi,et al.2015	SbMYB7	1	CaMV 35S	Scutellaria baicalensis	monocot	Nicotiana tabacum	dicot	No	0.2 M	mannitol	9 d										solid																									0.542636	10	0.514286
171	Linjie Qi,et al.2015	SbMYB2	1	CaMV 35S	Scutellaria baicalensis	monocot	Nicotiana tabacum	dicot	No	none	none	3 d										solid
172	Linjie Qi,et al.2015	SbMYB2	1	CaMV 35S	Scutellaria baicalensis	monocot	Nicotiana tabacum	dicot	No									150 mM	NaCl	medium	3 d	solid
173	Linjie Qi,et al.2015	SbMYB7	1	CaMV 35S	Scutellaria baicalensis	monocot	Nicotiana tabacum	dicot	No	none	none	3 d										solid
174	Linjie Qi,et al.2015	SbMYB7	1	CaMV 35S	Scutellaria baicalensis	monocot	Nicotiana tabacum	dicot	No									150 mM	NaCl	medium	3 d	solid
175	Linjie Qi,et al.2015	SbMYB2	1	CaMV 35S	Scutellaria baicalensis	monocot	Nicotiana tabacum	dicot	No	none	none	6 d										solid
176	Linjie Qi,et al.2015	SbMYB2	1	CaMV 35S	Scutellaria baicalensis	monocot	Nicotiana tabacum	dicot	No									150 mM	NaCl	medium	6 d	solid
177	Linjie Qi,et al.2015	SbMYB7	1	CaMV 35S	Scutellaria baicalensis	monocot	Nicotiana tabacum	dicot	No	none	none	6 d										solid
178	Linjie Qi,et al.2015	SbMYB7	1	CaMV 35S	Scutellaria baicalensis	monocot	Nicotiana tabacum	dicot	No									150 mM	NaCl	medium	6 d	solid
179	Linjie Qi,et al.2015	SbMYB2	1	CaMV 35S	Scutellaria baicalensis	monocot	Nicotiana tabacum	dicot	No	none	none	9 d										solid
180	Linjie Qi,et al.2015	SbMYB2	1	CaMV 35S	Scutellaria baicalensis	monocot	Nicotiana tabacum	dicot	No									150 mM	NaCl	medium	9 d	solid
181	Linjie Qi,et al.2015	SbMYB7	1	CaMV 35S	Scutellaria baicalensis	monocot	Nicotiana tabacum	dicot	No	none	none	9 d										solid
182	Linjie Qi,et al.2015	SbMYB7	1	CaMV 35S	Scutellaria baicalensis	monocot	Nicotiana tabacum	dicot	No									150 mM	NaCl	medium	9 d	solid
183	X.Meng,et al.2014	LeAN2	1	CaMV 35S	Lycopersicum esculentum	dicot	Nicotiana tabacum	dicot	No				4℃	chilling	1 d	other	0d					soil	2.73	4	0.04	4	4.22318	0.5
184	X.Meng,et al.2014	LeAN2	1	CaMV 35S	Lycopersicum esculentum	dicot	Nicotiana tabacum	dicot	No				4℃	chilling	0 h	other	0d					soil
185	X.Meng,et al.2014	LeAN2	1	CaMV 35S	Lycopersicum esculentum	dicot	Nicotiana tabacum	dicot	No				4℃	chilling	3 h	other	0d					soil
186	X.Meng,et al.2014	LeAN2	1	CaMV 35S	Lycopersicum esculentum	dicot	Nicotiana tabacum	dicot	No				4℃	chilling	6 h	other	0d					soil
187	X.Meng,et al.2014	LeAN2	1	CaMV 35S	Lycopersicum esculentum	dicot	Nicotiana tabacum	dicot	No				4℃	chilling	9 h	other	0d					soil
188	X.Meng,et al.2014	LeAN2	1	CaMV 35S	Lycopersicum esculentum	dicot	Nicotiana tabacum	dicot	No				4℃	chilling	12 h	other	0d					soil
189	X.Meng,et al.2014	LeAN2	1	CaMV 35S	Lycopersicum esculentum	dicot	Nicotiana tabacum	dicot	No				4℃	chilling	24 h	other	0d					soil
190	X.Meng,et al.2014	LeAN2	1	CaMV 35S	Lycopersicum esculentum	dicot	Nicotiana tabacum	dicot	No				4℃	chilling	recovery3 h	other	0d					soil
191	X.Meng,et al.2014	LeAN2	1	CaMV 35S	Lycopersicum esculentum	dicot	Nicotiana tabacum	dicot	No				4℃	chilling	recovery6 h	other	0d					soil
192	X.Meng,et al.2014	LeAN2	1	CaMV 35S	Lycopersicum esculentum	dicot	Nicotiana tabacum	dicot	No				4℃	chilling	0 h	other	0d					soil
193	X.Meng,et al.2014	LeAN2	1	CaMV 35S	Lycopersicum esculentum	dicot	Nicotiana tabacum	dicot	No				4℃	chilling	24 h	other	0d					soil
194	Rongkai Wang	MdSIMYB1	1	CaMV 35S	Malus domesica Borkh	dicot	Nicotiana benthamiana	dicot	No	none	none	1 d										solid																			0	50	0	50	0	0.04
195	Rongkai Wang	MdSIMYB1	1	CaMV 35S	Malus domesica Borkh	dicot	Nicotiana benthamiana	dicot	No	none	none	2 d										solid																			0.775194	50	0.775194	50	0	0.04
196	Rongkai Wang	MdSIMYB1	1	CaMV 35S	Malus domesica Borkh	dicot	Nicotiana benthamiana	dicot	No	none	none	3 d										solid																			12.4031	50	5.42636	50	0.826679	0.04
197	Rongkai Wang	MdSIMYB1	1	CaMV 35S	Malus domesica Borkh	dicot	Nicotiana benthamiana	dicot	No	none	none	4 d										solid																			34.8837	50	13.9535	50	0.916291	0.04
198	Rongkai Wang	MdSIMYB1	1	CaMV 35S	Malus domesica Borkh	dicot	Nicotiana benthamiana	dicot	No	none	none	5 d										solid																			50.1292	50	28.6822	50	0.558328	0.04
199	Rongkai Wang	MdSIMYB1	1	CaMV 35S	Malus domesica Borkh	dicot	Nicotiana benthamiana	dicot	No	none	none	6 d										solid																			72.093	50	37.2093	50	0.661398	0.04
200	Rongkai Wang	MdSIMYB1	1	CaMV 35S	Malus domesica Borkh	dicot	Nicotiana benthamiana	dicot	No	none	none	7 d										solid																			100	50	70.5426	50	0.348953	0.04
201	Rongkai Wang	MdSIMYB1	1	CaMV 35S	Malus domesica Borkh	dicot	Nicotiana benthamiana	dicot	No	none	none	8 d										solid																			100	50	100	50	0	0.04
202	Rongkai Wang	MdSIMYB1	1	CaMV 35S	Malus domesica Borkh	dicot	Nicotiana benthamiana	dicot	No									40 mM	NaCl	low	1 d																				0	50	0	50	0	0.04
203	Rongkai Wang	MdSIMYB1	1	CaMV 35S	Malus domesica Borkh	dicot	Nicotiana benthamiana	dicot	No									40 mM	NaCl	low	2 d																				0	50	0	50	0	0.04
204	Rongkai Wang	MdSIMYB1	1	CaMV 35S	Malus domesica Borkh	dicot	Nicotiana benthamiana	dicot	No									40 mM	NaCl	low	3 d																				15.0997	50	0	50	0	0.04
205	Rongkai Wang	MdSIMYB1	1	CaMV 35S	Malus domesica Borkh	dicot	Nicotiana benthamiana	dicot	No									40 mM	NaCl	low	4 d																				31.339	50	11.1111	50	1.03692	0.04
206	Rongkai Wang	MdSIMYB1	1	CaMV 35S	Malus domesica Borkh	dicot	Nicotiana benthamiana	dicot	No									40 mM	NaCl	low	5 d																				51.8519	50	19.6581	50	0.9699	0.04
207	Rongkai Wang	MdSIMYB1	1	CaMV 35S	Malus domesica Borkh	dicot	Nicotiana benthamiana	dicot	No									40 mM	NaCl	low	6 d																				59.8291	50	31.6239	50	0.637577	0.04
208	Rongkai Wang	MdSIMYB1	1	CaMV 35S	Malus domesica Borkh	dicot	Nicotiana benthamiana	dicot	No									40 mM	NaCl	low	7 d																				72.3647	50	31.6239	50	0.827804	0.04
209	Rongkai Wang	MdSIMYB1	1	CaMV 35S	Malus domesica Borkh	dicot	Nicotiana benthamiana	dicot	No									40 mM	NaCl	low	8 d																				82.3362	50	37.6068	50	0.783625	0.04
210	Rongkai Wang	MdSIMYB1	1	CaMV 35S	Malus domesica Borkh	dicot	Nicotiana benthamiana	dicot	No									80 mM	NaCl	low	1 d																				0	50	0	50	0	0.04
211	Rongkai Wang	MdSIMYB1	1	CaMV 35S	Malus domesica Borkh	dicot	Nicotiana benthamiana	dicot	No									80 mM	NaCl	low	2 d																				0	50	0	50	0	0.04
212	Rongkai Wang	MdSIMYB1	1	CaMV 35S	Malus domesica Borkh	dicot	Nicotiana benthamiana	dicot	No									80 mM	NaCl	low	3 d																				6.21469	50	0	50	0	0.04
213	Rongkai Wang	MdSIMYB1	1	CaMV 35S	Malus domesica Borkh	dicot	Nicotiana benthamiana	dicot	No									80 mM	NaCl	low	4 d																				12.1469	50	6.77966	50	0.583146	0.04
214	Rongkai Wang	MdSIMYB1	1	CaMV 35S	Malus domesica Borkh	dicot	Nicotiana benthamiana	dicot	No									80 mM	NaCl	low	5 d																				36.1582	50	16.9492	50	0.757686	0.04
215	Rongkai Wang	MdSIMYB1	1	CaMV 35S	Malus domesica Borkh	dicot	Nicotiana benthamiana	dicot	No									80 mM	NaCl	low	6 d																				43.2203	50	22.0339	50	0.673729	0.04
216	Rongkai Wang	MdSIMYB1	1	CaMV 35S	Malus domesica Borkh	dicot	Nicotiana benthamiana	dicot	No									80 mM	NaCl	low	7 d																				53.1073	50	27.1186	50	0.672094	0.04
217	Rongkai Wang	MdSIMYB1	1	CaMV 35S	Malus domesica Borkh	dicot	Nicotiana benthamiana	dicot	No									80 mM	NaCl	low	8 d																				61.5819	50	30.5085	50	0.702364	0.04
218	Peipei Sun,et al.2014	PtsrMYB	1	CaMV 35S	Poncirus trifoliata (L.)Raf	dicot	Nicotiana Tabacum	dicot	No	none	none	none										solid
219	Peipei Sun,et al.2014	PtsrMYB	1	CaMV 35S	Poncirus trifoliata (L.)Raf	dicot	Nicotiana Tabacum	dicot	No	without watering	drought	60 min										solid
220	Peipei Sun,et al.2014	PtsrMYB	1	CaMV 35S	Poncirus trifoliata (L.)Raf	dicot	Nicotiana Tabacum	dicot	No	without watering	drought	10 min										solid
221	Peipei Sun,et al.2014	PtsrMYB	1	CaMV 35S	Poncirus trifoliata (L.)Raf	dicot	Nicotiana Tabacum	dicot	No	without watering	drought	20 min										solid
222	Peipei Sun,et al.2014	PtsrMYB	1	CaMV 35S	Poncirus trifoliata (L.)Raf	dicot	Nicotiana Tabacum	dicot	No	without watering	drought	30 min										solid
223	Peipei Sun,et al.2014	PtsrMYB	1	CaMV 35S	Poncirus trifoliata (L.)Raf	dicot	Nicotiana Tabacum	dicot	No	without watering	drought	40 min										solid
224	Peipei Sun,et al.2014	PtsrMYB	1	CaMV 35S	Poncirus trifoliata (L.)Raf	dicot	Nicotiana Tabacum	dicot	No	without watering	drought	50 min										solid
225	Jingbin Li,et al.2014	SpMYB	1	CaMV 35S	Solanum Pimpinellifolium	dicot	Nicotiana Tabacum	dicot	No									200 mM	NaCl	medium	45 d	solid																									5.28571	3	2.96429
226	Jingbin Li,et al.2014	SpMYB	1	CaMV 35S	Solanum Pimpinellifolium	dicot	Nicotiana Tabacum	dicot	No	0.02	PEG	45 d										solid																									6.15476	3	2.5
227	Liqin Cheng,et al.2013	LcMYB1	1	CaMV 35S	Leymus chinensis	monocot	Arabidopsis thaliana	dicot	No									none	none		21 d	solid													99.5122	3	99.5122	3	0	0.666667
228	Liqin Cheng,et al.2013	LcMYB1	1	CaMV 35S	Leymus chinensis	monocot	Arabidopsis thaliana	dicot	No									150 mM	NaCl	medium	21 d	solid													67.3171	3	23.4146	3	1.05605	0.666667
229	Liqin Cheng,et al.2013	LcMYB1	1	CaMV 35S	Leymus chinensis	monocot	Arabidopsis thaliana	dicot	No									none	none		2 d	solid
230	Liqin Cheng,et al.2013	LcMYB1	1	CaMV 35S	Leymus chinensis	monocot	Arabidopsis thaliana	dicot	No									150 mM	NaCl	medium	2 d	solid
231	Lichao Zhang,et al.2012	TaMYB56-B	1	CaMV 35S	Triticum aestivum	monocot	Arabidopsis thaliana	dicot	No				-8℃	freezing	6 h	other	0d					soil													50.7912	10	0	10	0	0.2
232	Choonkyun Jung,et al.2008	AtMYB44	1	CaMV 35S	Arabidopsis thaliana	dicot	Arabidopsis thaliana	dicot	Yes	none	none	0 min										liquid
233	Choonkyun Jung,et al.2008	AtMYB44	1	CaMV 35S	Arabidopsis thaliana	dicot	Arabidopsis thaliana	dicot	Yes	without watering	drought	20 min
234	Choonkyun Jung,et al.2008	AtMYB44	1	CaMV 35S	Arabidopsis thaliana	dicot	Arabidopsis thaliana	dicot	Yes	without watering	drought	40 min
235	Choonkyun Jung,et al.2008	AtMYB44	1	CaMV 35S	Arabidopsis thaliana	dicot	Arabidopsis thaliana	dicot	Yes	without watering	drought	60 min
236	Choonkyun Jung,et al.2008	AtMYB44	1	CaMV 35S	Arabidopsis thaliana	dicot	Arabidopsis thaliana	dicot	Yes	without watering	drought	80 min
237	Choonkyun Jung,et al.2008	AtMYB44	1	CaMV 35S	Arabidopsis thaliana	dicot	Arabidopsis thaliana	dicot	Yes	without watering	drought	100 min
238	Choonkyun Jung,et al.2008	AtMYB44	1	CaMV 35S	Arabidopsis thaliana	dicot	Arabidopsis thaliana	dicot	Yes	without watering	drought	120 min
239	Choonkyun Jung,et al.2008	AtMYB44	1	CaMV 35S	Arabidopsis thaliana	dicot	Arabidopsis thaliana	dicot	Yes	without watering	drought	140 min
240	Choonkyun Jung,et al.2008	AtMYB44	1	CaMV 35S	Arabidopsis thaliana	dicot	Arabidopsis thaliana	dicot	Yes	without watering	drought	160 min
241	Choonkyun Jung,et al.2008	AtMYB44	1	CaMV 35S	Arabidopsis thaliana	dicot	Arabidopsis thaliana	dicot	Yes	without watering	drought	180 min
242	Choonkyun Jung,et al.2008	AtMYB44	1	CaMV 35S	Arabidopsis thaliana	dicot	Arabidopsis thaliana	dicot	Yes	without watering	drought	12 d										soil													0.8667	10	0.17	10	1.62889	0.2
243	Choonkyun Jung,et al.2008	AtMYB44	1	CaMV 35S	Arabidopsis thaliana	dicot	Arabidopsis thaliana	dicot	Yes									300mM	NaCl	high	36 d	soil													0.8633	10	0.17	10	1.62496	0.2
244	Candida Vannini,et al.2004	OsMYB4	1	CaMV 35S	Oryza sativa	monocot	Arabidopsis thaliana	dicot	No				0℃	chilling	2 h	other	0d					mix
245	Candida Vannini,et al.2004	OsMYB4	1	CaMV 35S	Oryza sativa	monocot	Arabidopsis thaliana	dicot	No				-2℃	freezing	2 h	yes	cold-acclimated at 5°C for 2d					mix
246	Candida Vannini,et al.2004	OsMYB4	1	CaMV 35S	Oryza sativa	monocot	Arabidopsis thaliana	dicot	No				-4℃	freezing	2 h	yes	cold-acclimated at 5°C for 2d					mix
247	Candida Vannini,et al.2004	OsMYB4	1	CaMV 35S	Oryza sativa	monocot	Arabidopsis thaliana	dicot	No				-6℃	freezing	2 h	yes	cold-acclimated at 5°C for 2d					mix
248	Candida Vannini,et al.2004	OsMYB4	1	CaMV 35S	Oryza sativa	monocot	Arabidopsis thaliana	dicot	No				-8℃	freezing	2 h	yes	cold-acclimated at 5°C for 2d					mix
249	Candida Vannini,et al.2004	OsMYB4	1	CaMV 35S	Oryza sativa	monocot	Arabidopsis thaliana	dicot	No				-10℃	freezing	2 h	yes	cold-acclimated at 5°C for 2d					mix
250	Candida Vannini,et al.2004	OsMYB4	1	CaMV 35S	Oryza sativa	monocot	Arabidopsis thaliana	dicot	No				-12℃	severe freezing	2 h	yes	cold-acclimated at 5°C for 2d					mix
251	Candida Vannini,et al.2004	OsMYB4	1	CaMV 35S	Oryza sativa	monocot	Arabidopsis thaliana	dicot	No				0℃	chilling	2 h	other	0d					mix
252	Candida Vannini,et al.2004	OsMYB4	1	CaMV 35S	Oryza sativa	monocot	Arabidopsis thaliana	dicot	No				-2℃	freezing	2 h	yes	cold-acclimated at 5°C for 6d					mix
253	Candida Vannini,et al.2004	OsMYB4	1	CaMV 35S	Oryza sativa	monocot	Arabidopsis thaliana	dicot	No				-4℃	freezing	2 h	yes	cold-acclimated at 5°C for 6d					mix
254	Candida Vannini,et al.2004	OsMYB4	1	CaMV 35S	Oryza sativa	monocot	Arabidopsis thaliana	dicot	No				-6℃	freezing	2 h	yes	cold-acclimated at 5°C for 6d					mix
255	Candida Vannini,et al.2004	OsMYB4	1	CaMV 35S	Oryza sativa	monocot	Arabidopsis thaliana	dicot	No				-8℃	freezing	2 h	yes	cold-acclimated at 5°C for 6d					mix
256	Candida Vannini,et al.2004	OsMYB4	1	CaMV 35S	Oryza sativa	monocot	Arabidopsis thaliana	dicot	No				-10℃	freezing	2 h	yes	cold-acclimated at 5°C for 6d					mix
257	Candida Vannini,et al.2004	OsMYB4	1	CaMV 35S	Oryza sativa	monocot	Arabidopsis thaliana	dicot	No				-12℃	severe freezing	2 h	yes	cold-acclimated at 5°C for 6d					mix
258	Candida Vannini,et al.2004	OsMYB4	1	CaMV 35S	Oryza sativa	monocot	Arabidopsis thaliana	dicot	No				0℃	chilling	2 h	other	0d					mix
259	Candida Vannini,et al.2004	OsMYB4	1	CaMV 35S	Oryza sativa	monocot	Arabidopsis thaliana	dicot	No				-2℃	freezing	2 h	yes	cold-acclimated at 5°C for 10d					mix
260	Candida Vannini,et al.2004	OsMYB4	1	CaMV 35S	Oryza sativa	monocot	Arabidopsis thaliana	dicot	No				-4℃	freezing	2 h	yes	cold-acclimated at 5°C for 10d					mix
261	Candida Vannini,et al.2004	OsMYB4	1	CaMV 35S	Oryza sativa	monocot	Arabidopsis thaliana	dicot	No				-6℃	freezing	2 h	yes	cold-acclimated at 5°C for 10d					mix
262	Candida Vannini,et al.2004	OsMYB4	1	CaMV 35S	Oryza sativa	monocot	Arabidopsis thaliana	dicot	No				-8℃	freezing	2 h	yes	cold-acclimated at 5°C for 10d					mix
263	Candida Vannini,et al.2004	OsMYB4	1	CaMV 35S	Oryza sativa	monocot	Arabidopsis thaliana	dicot	No				-10℃	freezing	2 h	yes	cold-acclimated at 5°C for 10d					mix
264	Candida Vannini,et al.2004	OsMYB4	1	CaMV 35S	Oryza sativa	monocot	Arabidopsis thaliana	dicot	No				-12℃	severe freezing	2 h	yes	cold-acclimated at 5°C for 10d					mix
265	Candida Vannini,et al.2004	OsMYB4	1	CaMV 35S	Oryza sativa	monocot	Arabidopsis thaliana	dicot	No				0℃	chilling	2 h	other	0d					solid
266	Candida Vannini,et al.2004	OsMYB4	1	CaMV 35S	Oryza sativa	monocot	Arabidopsis thaliana	dicot	No				-2℃	freezing	2 h	other	0d					solid
267	Candida Vannini,et al.2004	OsMYB4	1	CaMV 35S	Oryza sativa	monocot	Arabidopsis thaliana	dicot	No				-4℃	freezing	2 h	other	0d					solid
268	Candida Vannini,et al.2004	OsMYB4	1	CaMV 35S	Oryza sativa	monocot	Arabidopsis thaliana	dicot	No				-6℃	freezing	2 h	other	0d					solid
269	Candida Vannini,et al.2004	OsMYB4	1	CaMV 35S	Oryza sativa	monocot	Arabidopsis thaliana	dicot	No				-8℃	freezing	2 h	other	0d					solid
270	Candida Vannini,et al.2004	OsMYB4	1	CaMV 35S	Oryza sativa	monocot	Arabidopsis thaliana	dicot	No				-10℃	freezing	2 h	other	0d					solid
271	Candida Vannini,et al.2004	OsMYB4	1	CaMV 35S	Oryza sativa	monocot	Arabidopsis thaliana	dicot	No				-12℃	severe freezing	2 h	other	0d					solid
272	Candida Vannini,et al.2004	OsMYB4	1	CaMV 35S	Oryza sativa	monocot	Arabidopsis thaliana	dicot	No				-4℃	freezing	0 h	other	0d					solid
273	Candida Vannini,et al.2004	OsMYB4	1	CaMV 35S	Oryza sativa	monocot	Arabidopsis thaliana	dicot	No				-4℃	freezing	1 h	other	0d					solid
274	Candida Vannini,et al.2004	OsMYB4	1	CaMV 35S	Oryza sativa	monocot	Arabidopsis thaliana	dicot	No				-4℃	freezing	2 h	other	0d					solid
275	Candida Vannini,et al.2004	OsMYB4	1	CaMV 35S	Oryza sativa	monocot	Arabidopsis thaliana	dicot	No				-4℃	freezing	3 h	other	0d					solid
276	Candida Vannini,et al.2004	OsMYB4	1	CaMV 35S	Oryza sativa	monocot	Arabidopsis thaliana	dicot	No				-4℃	freezing	4 h	other	0d					solid
277	Candida Vannini,et al.2004	OsMYB4	1	CaMV 35S	Oryza sativa	monocot	Arabidopsis thaliana	dicot	No				-4℃	freezing	5 h	other	0d					solid
278	Candida Vannini,et al.2004	OsMYB4	1	CaMV 35S	Oryza sativa	monocot	Arabidopsis thaliana	dicot	No				-4℃	freezing	6 h	other	0d					solid
279	Candida Vannini,et al.2004	OsMYB4	1	CaMV 35S	Oryza sativa	monocot	Arabidopsis thaliana	dicot	No				-4℃	freezing	7 h	other	0d					solid
280	Candida Vannini,et al.2004	OsMYB4	1	CaMV 35S	Oryza sativa	monocot	Arabidopsis thaliana	dicot	No				-4℃	freezing	0 h	other	0d					mix
281	Candida Vannini,et al.2004	OsMYB4	1	CaMV 35S	Oryza sativa	monocot	Arabidopsis thaliana	dicot	No				-4℃	freezing	1 h	yes	cold-acclimated at 5°C for 2d					mix
282	Candida Vannini,et al.2004	OsMYB4	1	CaMV 35S	Oryza sativa	monocot	Arabidopsis thaliana	dicot	No				-4℃	freezing	2 h	yes	cold-acclimated at 5°C for 2d					mix
283	Candida Vannini,et al.2004	OsMYB4	1	CaMV 35S	Oryza sativa	monocot	Arabidopsis thaliana	dicot	No				-4℃	freezing	3 h	yes	cold-acclimated at 5°C for 2d					mix
284	Candida Vannini,et al.2004	OsMYB4	1	CaMV 35S	Oryza sativa	monocot	Arabidopsis thaliana	dicot	No				-4℃	freezing	4 h	yes	cold-acclimated at 5°C for 2d					mix
285	Candida Vannini,et al.2004	OsMYB4	1	CaMV 35S	Oryza sativa	monocot	Arabidopsis thaliana	dicot	No				-4℃	freezing	5 h	yes	cold-acclimated at 5°C for 2d					mix
286	Candida Vannini,et al.2004	OsMYB4	1	CaMV 35S	Oryza sativa	monocot	Arabidopsis thaliana	dicot	No				-4℃	freezing	6 h	yes	cold-acclimated at 5°C for 2d					mix
287	Candida Vannini,et al.2004	OsMYB4	1	CaMV 35S	Oryza sativa	monocot	Arabidopsis thaliana	dicot	No				-4℃	freezing	7 h	yes	cold-acclimated at 5°C for 2d					mix
288	Candida Vannini,et al.2004	OsMYB4	1	CaMV 35S	Oryza sativa	monocot	Arabidopsis thaliana	dicot	No				-4℃	freezing	0 h	other	0d					solid
289	Candida Vannini,et al.2004	OsMYB4	1	CaMV 35S	Oryza sativa	monocot	Arabidopsis thaliana	dicot	No				-4℃	freezing	1 h	yes	cold-acclimated at 5°C for 6d					solid
290	Candida Vannini,et al.2004	OsMYB4	1	CaMV 35S	Oryza sativa	monocot	Arabidopsis thaliana	dicot	No				-4℃	freezing	2 h	yes	cold-acclimated at 5°C for 6d					solid
291	Candida Vannini,et al.2004	OsMYB4	1	CaMV 35S	Oryza sativa	monocot	Arabidopsis thaliana	dicot	No				-4℃	freezing	3 h	yes	cold-acclimated at 5°C for 6d					solid
292	Candida Vannini,et al.2004	OsMYB4	1	CaMV 35S	Oryza sativa	monocot	Arabidopsis thaliana	dicot	No				-4℃	freezing	4 h	yes	cold-acclimated at 5°C for 6d					solid
293	Candida Vannini,et al.2004	OsMYB4	1	CaMV 35S	Oryza sativa	monocot	Arabidopsis thaliana	dicot	No				-4℃	freezing	5 h	yes	cold-acclimated at 5°C for 6d					solid
294	Candida Vannini,et al.2004	OsMYB4	1	CaMV 35S	Oryza sativa	monocot	Arabidopsis thaliana	dicot	No				-4℃	freezing	6 h	yes	cold-acclimated at 5°C for 6d					solid
295	Candida Vannini,et al.2004	OsMYB4	1	CaMV 35S	Oryza sativa	monocot	Arabidopsis thaliana	dicot	No				-4℃	freezing	7 h	yes	cold-acclimated at 5°C for 6d					solid
296	Candida Vannini,et al.2004	OsMYB4	1	CaMV 35S	Oryza sativa	monocot	Arabidopsis thaliana	dicot	No				-4℃	freezing	0 h	other	0d					solid
297	Candida Vannini,et al.2004	OsMYB4	1	CaMV 35S	Oryza sativa	monocot	Arabidopsis thaliana	dicot	No				-4℃	freezing	1 h	yes	cold-acclimated at 5°C for 10d					solid
298	Candida Vannini,et al.2004	OsMYB4	1	CaMV 35S	Oryza sativa	monocot	Arabidopsis thaliana	dicot	No				-4℃	freezing	2 h	yes	cold-acclimated at 5°C for 10d					solid
299	Candida Vannini,et al.2004	OsMYB4	1	CaMV 35S	Oryza sativa	monocot	Arabidopsis thaliana	dicot	No				-4℃	freezing	3 h	yes	cold-acclimated at 5°C for 10d					solid
300	Candida Vannini,et al.2004	OsMYB4	1	CaMV 35S	Oryza sativa	monocot	Arabidopsis thaliana	dicot	No				-4℃	freezing	4 h	yes	cold-acclimated at 5°C for 10d					solid
301	Candida Vannini,et al.2004	OsMYB4	1	CaMV 35S	Oryza sativa	monocot	Arabidopsis thaliana	dicot	No				-4℃	freezing	5 h	yes	cold-acclimated at 5°C for 10d					solid
302	Candida Vannini,et al.2004	OsMYB4	1	CaMV 35S	Oryza sativa	monocot	Arabidopsis thaliana	dicot	No				-4℃	freezing	6 h	yes	cold-acclimated at 5°C for 10d					solid
303	Candida Vannini,et al.2004	OsMYB4	1	CaMV 35S	Oryza sativa	monocot	Arabidopsis thaliana	dicot	No				-4℃	freezing	7 h	yes	cold-acclimated at 5°C for 10d					solid
304	Candida Vannini,et al.2004	OsMYB4	1	CaMV 35S	Oryza sativa	monocot	Arabidopsis thaliana	dicot	No				4℃	chilling		other	0d					solid
305	Hye-Jung Lee,et al.2012	OsMLD	1	CaMV 35S	Oryza sativa	monocot	Oryza sativa	monocot	Yes	none	none	10 d										solid
306	Hye-Jung Lee,et al.2012	OsMLD	1	CaMV 35S	Oryza sativa	monocot	Oryza sativa	monocot	Yes									250 mM	NaCl	high	10 d	solid
307	Mingzhu Dou,et al.2016	AmRosea1	1	CaMV 35S	Antirrhinum majus	dicot	Oryza sativa	monocot	No	without watering	drought	18 d										mix													0.81	24	0.208	24	1.3595	0.0833333
308	Mingzhu Dou,et al.2016	AmRosea1	1	CaMV 35S	Antirrhinum majus	dicot	Oryza sativa	monocot	No									250 mM	NaCl	high	10 d	mix													0.71333	24	0	24	0	0.0833333
The red font is contrast study
[truncated: 375 more columns]

## Sheet: paper
No.	Author (year)	Journal	Title
1	Haifeng Xu,et.al.2018	Biochemical and Biophysical Research Communications	Overexpression of a repressor MdMYB15L negatively regulates anthocyanin and cold tolerance in red-flesh callus
2	Fei Gao,et.al.2017	Journal of Plant Physiology	Overexpression of a tartary buckwheat R2R3-MYB transcription factor gene,FtMYB9,enhances tolerance to drought and salt stresses in transgenic Arabidopsis.
3	Xuming Yin,et.al.2017	Biochemical and Biophysical Research Communications	Overexpression of a novel MYB-related transcription factor, OsMYBR1,confers improved drought tolerance and decreased ABA sensitivity in rice
4	Yan Wang,et al.2017	Journal Of Plant Biology.	Overexpression of a Maize MYB48 Gene Confers Drought Tolerance in Transgenic Arabidopsis Plants
5	Yong-Tao Yu,et al.2016	Plant Molecular Biology	Overexpression of the MYB37 transcription factor enhances abscisic acid sensitivity, and improves both drought tolerance and seed productivity in Arabidopsis thaliana
6	Haiyan Xiong,et al.2014	Plos One	Overexpression of OsMYB48-1, a Novel MYB-Related Transcription Factor, Enhances Drought and Salinity Tolerance in Rice
7	Yuxiang Qin,et al.2012	Molecular Biology Reports	Over-expression of TaMYB33 encoding a novel wheat MYB transcription factor increases salt and drought tolerance in Arabidopsis
8	Im, Ju Sung,et al.2012	Journal of Plant Biotechnology	Growth, quality, and yield characteristics of transgenic potato (Solanum tuberosum L.) overexpressing StMyb1R-1 under water deficit
9	Min Young Park,et al.2012	Molecules and Cells	Overexpression of AtMYB52 confers ABA hypersensitivity and drought tolerance
10	Xiaoyan Dai,et al.2007	Plant Physiology.	Overexpression of an R1R2R3 MYB gene, OsMYB3R-2, increases tolerance to freezing, drought, and salt stress in transgenic Arabidopsis
11	Chan Young Jeong,et al.2018	Plant Growth Regulation	Overexpression of abiotic stress-induced AtMYBL-O results in negative modulation of abscisic acid signaling through the downregulation of abscisic acid-responsive genes in Arabidopsis thaliana
12	Yuxuan He,et al.2018	Biochemical and Biophysical Research Communications	Overexpression of a novel transcriptional repressor GmMYB3a negatively regulates salt-alkali tolerance and stress-related genes in soybean
13	X.W.Li,et al.2016	Genetics and Molecular Research	Overexpression of soybean R2R3-MYB transcription factor, GmMYB12B2, and tolerance to UV radiation and salt stress in transgenic Arabidopsis
14	Tian Li,et al.2016	Journal of Plant Growth Regulation	Overexpression of an MYB-Related Gene FvMYB1 from Fraxinus velutina Increases Tolerance to Salt Stress in Transgenic Tobacco
15	Pushp Sheel Shukla,et al.2015	Planta	Overexpression of a novel SbMYB15 from Salicornia brachiata confers salinity and dehydration tolerance by reduced oxidative damage and improved photosynthesis in transgenic tobacco
16	Linjie Qi,et al.2015	Plant Physiology and Biochemistry	Overexpression of two R2R3-MYB genes from Scutellaria baicalensis induces phenylpropanoid accumulation and enhances oxidative stress resistance in transgenic tobacco
17	X.Meng,et al.2014	Biologia Plantarum.	Overexpression of R2R3-MYB gene leads to accumulation of anthocyanin and enhanced resistance to chilling and oxidative stress
18	Rongkai Wang,et al.2014	Physiologia Plantarum	Overexpression of a R2R3 MYB gene MdSIMYB1 increases tolerance to multiple stresses in transgenic tobacco and apples
19	Peipei Sun,et al.2014	Plant Physiology and Biochemistry	Overexpression of a stress-responsive MYB transcription factor of Poncirus trifoliata confers enhanced dehydration tolerance and increases polyamine biosynthesis
20	Jingbin Li,et al.2014	Gene	SpMYB overexpression in tobacco plants leads to altered abiotic and biotic stress responses
21	Liqin Cheng,et al.2013	Plant Physiology and Biochemistry	Overexpression of sheepgrass R1-MYB transcription factor LcMYB1 confers salt tolerance in transgenic Arabidopsis
22	Lichao Zhang,et al.2012	Gene	Overexpression of a wheat MYB transcription factor gene, TaMYB56-B, enhances tolerances to freezing and salt stresses in transgenic Arabidopsis
23	Choonkyun Jung,et al.2008	Plant Physiology	Overexpression of AtMYB44 enhances stomatal closure to confer abiotic stress tolerance in transgenic Arabidopsis
24	Candida Vannini,et al.2004	Plant Journal	Overexpression of the rice Osmyb4 gene increases chilling and freezing tolerance of Arabidopsis thaliana plants
25	Hye-Jung Lee,et al.2012	Korean Journal of Breeding Science	Overexpression of OsMLD Encoding MYB-like DNA Binding Domain Increases Tolerance to Salt Stress in Rice (Oryza sativa L.)
26	Mingzhu Dou,et al.2016	International Journal of Molecular Sciences	Overexpression of AmRosea1 Gene Confers Drought and Salt Tolerance in Rice

## Sheet: search terms
To search for the keyword combination
"MYB（gene）"AND overexpress
"MYB（gene）" AND transgenic
"MYB（gene）" AND salt
"MYB（gene）" AND salin/saline/salina
"MYB（gene）" AND NaCl
"MYB（gene）" AND stress
"MYB（gene）" AND abiotic stress
"MYB（gene）" AND waterlog
"MYB（gene）" AND water stress
"MYB（gene）" AND heat
"MYB（gene）" AND chilly
"MYB（gene）" AND inundate
"MYB（gene）" AND drought
"MYB（gene）" AND cold
"MYB（gene）" AND freeze
"MYB（gene）" AND low temperature
"MYB（gene）" AND high temperature
"MYB" AND overexpress
"MYB" AND transgenic
"MYB" AND salt
"MYB" AND salin/saline/salina
"MYB" AND NaCl
"MYB" AND stress
"MYB" AND abiotic stress
"MYB" AND waterlog
"MYB" AND water stress
"MYB" AND heat
"MYB" AND chilly
"MYB" AND inundate
"MYB" AND drought
"MYB" AND cold
"MYB" AND freeze
"MYB" AND low temperature
"MYB" AND high temperature

## Sheet: Database
Database
KJD	KCI-Korean Journal Database
MEDLINE	MEDLINE
BCI	BIOSIS Citation Index
SCIELO	SciELO Citation Index
WOS	Web of ScienceTM
RSCI	Russian Science Citation Index

## Sheet: Moderator levels
Moderator	Levels
Cold stress
Treatment media	solid	mix（solid+liquid/soil）	liquid	soil
Stress severity	normal(25)	low(10~25)	chilling(0~10)	freezing(-10~-1)	severe freezing(-20~-11)
Receptor type	dicot	monocot
Stress type	other	A	B	C	D
Receptor genus	other	A	B	C	D
Donor type	dicot	monocot
Donor genus	other	A	B	C	D
Donor and receptor genus same	yes	no
Acclimated or not	yes	other
Acclimated detials	0d	cold-acclimated at 5°C for 2d	cold-acclimated at 5°C for 6d	cold-acclimated at 5°C for 10d
Drought stress
Treatment media	solid	mix（solid+liquid/soil）	liquid	soil
Stress severity	PEG	Mannitol	drought
Duration of exposure to drought stress	＜2 days	2-10 days	11-20 days	＞20d	other
Receptor type	dicot	monocot
Stress type	other	A	B	C	D
Receptor genus	other	A	B	C	D
Donor type	dicot	monocot
Donor genus	other	A	B	C	D
Donor and receptor genus same	yes	no
Salt stress
Treatment media	solid	mix（solid+liquid/soil）	liquid	soil
Stress severity	low＜100mM	medium100-200mM	high＞200mM
Duration of exposure to salt stress	＜2 days	2-10 days	11-20 days	＞20d
Stress type	other	A	B	C	D
Receptor type	dicot	monocot
Receptor genus	other	A	B	C	D
Donor type	dicot	monocot
Donor genus	other	A	B	C	D
Donor and receptor genus same	yes	no
data of every levels should more than 3 studies and from more than 1 paper
data of every levels should more than 3 studies and from more than 1 paper, "A", "B", "C" and "D" mean the data of this level more than 3 studies

## Sheet: Publication bias
Judge the impact of bias on the risk ratio and classify the results into one of three categories (a) the effect of bias may be not important, (b) the effect of bias exists but does not affect the main conclusions, and (c) the effect of bias exists and might change major finding
Cold stress	Relative electrolyte leakage
	Funnel plot	symmetric
	Classic fail-safe N	number of missing studies=11.000
	Orwin's fail-safe N	mean point(log) in missing studies =0.000	point(log) in observeed studies=-0.379
	Begg and Mazumdar rank correlation	Kendall's tau=-0.007	P-value=[0.491,0.981]
	Egger's regression intercrept	Intercept=-0.535	df=23.000	t-value=0.253	P-value=[0.401,0.802]
	Duval and Tweedie's trim and fill	studies trimmed=0	adjusted point estimate=-0.37860	point estimate observeed=-0.37860
Drought stress	Water loss
	Funnel plot	symmetric
	Classic fail-safe N	number of missing studies=46.000
	Orwin's fail-safe N	mean point(log) in missing studies =0.000	point(log) in observeed studies=-0.245
	Begg and Mazumdar rank correlation	Kendall's tau=0.156	P-value=[0.065,0.130]
	Egger's regression intercrept	Intercept=0.376	df=44.000	t-value=1.700	P-value=[0.048,0.096]
	Duval and Tweedie's trim and fill	studies trimmed=7	adjusted point estimate=-0.27870	point estimate observeed=-0.24539
Drought stress	Survival
	Funnel plot	asymmetric
	Classic fail-safe N	number of missing studies=495.000
	Orwin's fail-safe N	mean point(log) in missing studies =0.000	point(log) in observeed studies=1.554
	Begg and Mazumdar rank correlation	Kendall's tau=-0.218	P-value=[0.196,0.392]
	Egger's regression intercrept	Intercept=-0.702	df=9.000	t-value=0.564	P-value=[0.293,0.587]
	Duval and Tweedie's trim and fill	studies trimmed=0	adjusted point estimate=1.52498	point estimate observeed=1.52498
Salt stress	Germination
	Funnel plot	asymmetric
	Classic fail-safe N	number of missing studies=1759.000
	Orwin's fail-safe N	mean point(log) in missing studies =0	point(log) in observeed studies=0.430
	Begg and Mazumdar rank correlation	Kendall's tau=-0.032	P-value=[0.397,0.794]
	Egger's regression intercrept	Intercept=-0.580	df=41.000	t-value=0.552	P-value=[0.292,0.584]
	Duval and Tweedie's trim and fill	studies trimmed=0	adjusted point estimate=0.41848	point estimate observeed=0.41848
Salt stress	Root length
	Funnel plot	asymmetric
	Classic fail-safe N	number of missing studies=29.000
	Orwin's fail-safe N	mean point(log) in missing studies =0.000	point(log) in observeed studies=0.312
	Begg and Mazumdar rank correlation	Kendall's tau=0.071	P-value=[0.327,0.653]
	Egger's regression intercrept	Intercept=1.017	df=21.000	t-value=1.854	P-value=[0.039,0.078]
	Duval and Tweedie's trim and fill	studies trimmed=10	adjusted point estimate=0.01475	point estimate observeed=0.31188
Salt stress	Fresh weight
	Funnel plot	symmetric
	Classic fail-safe N	number of missing studies=15.000
	Orwin's fail-safe N	mean point(log) in missing studies =0.000	point(log) in observeed studies=0.382
	Begg and Mazumdar rank correlation	Kendall's tau=0.389	P-value=[0.088,0.175]
	Egger's regression intercrept	Intercept=2.438	df=7.000	t-value=1.132	P-value=[0.148,0.295]
	Duval and Tweedie's trim and fill	studies trimmed=2	adjusted point estimate=0.25986	point estimate observeed=0.41489

## Sheet: Table 4
p<0.1	Stress severity			Acclimated or not			Acclimated details			Treatment media			Donor genus			Donor type			Recipient genus			Recipient type			Donor and recipient genus same			Stress time
	Qm	df	phetero	Qm	df	phetero	Qm	df	phetero	Qm	df	phetero	Qm	df	phetero	Qm	df	phetero	Qm	df	phetero	Qm	df	phetero	Qm	df	phetero	Qm	df	phetero
Relative electrolyte leakage (Cold stress)	0.013	2	0.993521	0.069	1	0.792798	1.722	3	0.632054	0.069	2	0.966088
Water loss (Drought stress)										0.887	2	0.641786	0.62	2	0.733447	0.161	1	0.688238	4.93	2	0.0850088	1.861	1	0.172509	0.977	1	0.322941	0.002	1	0.964329
Survival (Drought stress)										2.798	1	0.094382	3.19	1	0.07409	5.646	1	0.0174952	2.288	1	0.130378	2.288	1	0.130378	0.048	1	0.826581	2.805	2	0.245981
Germination (NaCl stress)	0.033	1	0.85585							0.523	2	0.769896	0.373	2	0.829859	0.2	1	0.654721	0.355	1	0.551296				0.801	1	0.370795
Root length (NaCl stress)	0.657	2	0.720003										3.975	2	0.137038	3.743	1	0.0530292	4.545	1	0.033015							8.536	2	0.0140098
Fresh weight (NaCl stress)													7.024	1	0.00804244				7.024	1	0.00804244				7.024	1	0.00804244
