# Supplementary material for: Meta-analysis of the effect of expression of MYB transcription factor genes on abiotic stress
Source: PeerJ. 2021 Jun 8;9:e11268. doi: 10.7717/peerj.11268 (PMC8194419; doi:10.7717/peerj.11268)
Supplement: Supplemental Information 3 [file peerj-09-11268-s003.xlsx]

## Sheet: Cold stress
Supporting Information 2. Details on the MYB-overexpression studies used in the meta-analyses, including each of the moderators used for categorical analyses, the transgenic and untransformed control means, sample sizes (n) and the value of the natural log (ln) of the response ratio with corresponding non-parametric variances.
		Moderators																				EFFECT SIZES
		Transformation			Gene donor		Gene recipient			Low temperature					Experimental conditions	Anthocyanin content (Abs/g FW)						Survival						Relative Electrolyte leakage (REL)						Fv/Fm						Proline content
Study No.	Publication	Gene member	Gene number	Promoters	Donor genus	Donor type	Recipient genus	Recipient type	Donor and recipient genus same	Low temperature ℃	Stress severity	Acclimated or not	Acclimated detials	Time	Treatment Media	Mean trans	n trans	Mean non-trans	n non-trans	In R anthocyanin content	variance anthocyanin content	Mean trans	n trans	Mean non-trans	n non-trans	ln R survival	variance survival	Mean trans	n trans	Mean non-trans	n non-trans	ln R electrolyte leakage	variance electrolyte leakage	Mean trans	n trans	Mean non-trans	n non-trans	ln R Fv/Fm	variance Fv/Fm	Mean trans	n trans	Mean non-trans	n non-trans	ln R proline content	variance proline content
1	Xiaoyan Dai et al.2007	OsMYB3R-2	1	CaMV 35S	Oryza sativa	monocot	Arabidopsis thaliana	dicot	No	-8	freezing	other	0d	10h	soil							68.5417	3	26.875	3	0.936245	0.666667
2	Xiaoyan Dai et al.2007	OsMYB3R-2	1	CaMV 35S	Oryza sativa	monocot	Arabidopsis thaliana	dicot	No	-2	freezing	other	0d	10h	soil							100	3	100	3	0	0.666667
3	Xiaoyan Dai et al.2007	OsMYB3R-2	1	CaMV 35S	Oryza sativa	monocot	Arabidopsis thaliana	dicot	No	-4	freezing	other	0d	10h	soil							100.667	3	85.3333	3	0.16525	0.666667
4	Xiaoyan Dai et al.2007	OsMYB3R-2	1	CaMV 35S	Oryza sativa	monocot	Arabidopsis thaliana	dicot	No	-6	freezing	other	0d	10h	soil							93.3333	3	38.6667	3	0.881199	0.666667
5	Xiaoyan Dai et al.2007	OsMYB3R-2	1	CaMV 35S	Oryza sativa	monocot	Arabidopsis thaliana	dicot	No	-8	freezing	other	0d	10h	soil							69.7778	3	25.3333	3	1.01319	0.666667
6	Xiaoyan Dai et al.2007	OsMYB3R-2	1	CaMV 35S	Oryza sativa	monocot	Arabidopsis thaliana	dicot	No	-10	freezing	other	0d	10h	soil							47.5556	3	6	3	2.07014	0.666667
7	X.Meng,et al.2014	LeAN2	1	CaMV 35S	Lycopersicum esculentum	dicot	Nicotiana tabacum	dicot	No	4	chilling	other	0d	1d	soil	2.73	4	0.04	4	4.22318	0.5
8	X.Meng,et al.2014	LeAN2	1	CaMV 35S	Lycopersicum esculentum	dicot	Nicotiana tabacum	dicot	No	4	chilling	other	0d	3h	soil																			0.846667	4	0.82	4	0.0320028	0.5
9	X.Meng,et al.2014	LeAN2	1	CaMV 35S	Lycopersicum esculentum	dicot	Nicotiana tabacum	dicot	No	4	chilling	other	0d	6h	soil																			0.826667	4	0.82	4	0.00809725	0.5
10	X.Meng,et al.2014	LeAN2	1	CaMV 35S	Lycopersicum esculentum	dicot	Nicotiana tabacum	dicot	No	4	chilling	other	0d	9h	soil																			0.806667	4	0.78	4	0.0336167	0.5
11	X.Meng,et al.2014	LeAN2	1	CaMV 35S	Lycopersicum esculentum	dicot	Nicotiana tabacum	dicot	No	4	chilling	other	0d	12h	soil																			0.796667	4	0.77	4	0.0340459	0.5
12	X.Meng,et al.2014	LeAN2	1	CaMV 35S	Lycopersicum esculentum	dicot	Nicotiana tabacum	dicot	No	4	chilling	other	0d	24h	soil																			0.78	4	0.73	4	0.0662494	0.5
13	X.Meng,et al.2014	LeAN2	1	CaMV 35S	Lycopersicum esculentum	dicot	Nicotiana tabacum	dicot	No	4	chilling	other	0d	recovery3h	soil																			0.83	4	0.79	4	0.0493928	0.5
14	X.Meng,et al.2014	LeAN2	1	CaMV 35S	Lycopersicum esculentum	dicot	Nicotiana tabacum	dicot	No	4	chilling	other	0d	recovery6h	soil																			0.84	4	0.8	4	0.0487902	0.5
15	X.Meng,et al.2014	LeAN2	1	CaMV 35S	Lycopersicum esculentum	dicot	Nicotiana tabacum	dicot	No	4	chilling	other	0d	24h	soil													38.5667	4	53.28	4	-0.323173	0.5
16	Lichao Zhang,et al.2012	TaMYB56-B	1	CaMV 35S	Triticum aestivum	monocot	Arabidopsis thaliana	dicot	No	-8	freezing	other	0d	6h	soil							50.7912	10	0	10	0	0.2													180.556	10	115.53	10	0.446506	0.2
17	Candida Vannini,et al.2004	OsMYB4	1	CaMV 35S	Oryza sativa	monocot	Arabidopsis thaliana	dicot	No	-2	freezing	yes	cold-acclimated at 5°C for 2d	2h	mix													18.0556	3	18.5185	3	-0.0253178	0.666667
18	Candida Vannini,et al.2004	OsMYB4	1	CaMV 35S	Oryza sativa	monocot	Arabidopsis thaliana	dicot	No	-4	freezing	yes	cold-acclimated at 5°C for 2d	2h	mix													26.3889	3	30.5556	3	-0.146603	0.666667
19	Candida Vannini,et al.2004	OsMYB4	1	CaMV 35S	Oryza sativa	monocot	Arabidopsis thaliana	dicot	No	-6	freezing	yes	cold-acclimated at 5°C for 2d	2h	mix													39.8148	3	43.5185	3	-0.0889475	0.666667
20	Candida Vannini,et al.2004	OsMYB4	1	CaMV 35S	Oryza sativa	monocot	Arabidopsis thaliana	dicot	No	-8	freezing	yes	cold-acclimated at 5°C for 2d	2h	mix													46.2963	3	53.7037	3	-0.14842	0.666667
21	Candida Vannini,et al.2004	OsMYB4	1	CaMV 35S	Oryza sativa	monocot	Arabidopsis thaliana	dicot	No	-10	freezing	yes	cold-acclimated at 5°C for 2d	2h	mix													62.963	3	65.2778	3	-0.036105	0.666667
22	Candida Vannini,et al.2004	OsMYB4	1	CaMV 35S	Oryza sativa	monocot	Arabidopsis thaliana	dicot	No	-12	severe freezing	yes	cold-acclimated at 5°C for 2d	2h	mix													66.2037	3	71.7593	3	-0.0805805	0.666667
23	Candida Vannini,et al.2004	OsMYB4	1	CaMV 35S	Oryza sativa	monocot	Arabidopsis thaliana	dicot	No	-2	freezing	yes	cold-acclimated at 5°C for 6d	2h	mix													12.5	3	18.5185	3	-0.393043	0.666667
24	Candida Vannini,et al.2004	OsMYB4	1	CaMV 35S	Oryza sativa	monocot	Arabidopsis thaliana	dicot	No	-4	freezing	yes	cold-acclimated at 5°C for 6d	2h	mix													18.9815	3	30.5556	3	-0.476083	0.666667
25	Candida Vannini,et al.2004	OsMYB4	1	CaMV 35S	Oryza sativa	monocot	Arabidopsis thaliana	dicot	No	-6	freezing	yes	cold-acclimated at 5°C for 6d	2h	mix													27.3148	3	43.5185	3	-0.465757	0.666667
26	Candida Vannini,et al.2004	OsMYB4	1	CaMV 35S	Oryza sativa	monocot	Arabidopsis thaliana	dicot	No	-8	freezing	yes	cold-acclimated at 5°C for 6d	2h	mix													35.6481	3	53.7037	3	-0.409785	0.666667
27	Candida Vannini,et al.2004	OsMYB4	1	CaMV 35S	Oryza sativa	monocot	Arabidopsis thaliana	dicot	No	-10	freezing	yes	cold-acclimated at 5°C for 6d	2h	mix													42.5926	3	65.2778	3	-0.426971	0.666667
28	Candida Vannini,et al.2004	OsMYB4	1	CaMV 35S	Oryza sativa	monocot	Arabidopsis thaliana	dicot	No	-12	severe freezing	yes	cold-acclimated at 5°C for 6d	2h	mix													45.3704	3	71.7593	3	-0.458458	0.666667
29	Candida Vannini,et al.2004	OsMYB4	1	CaMV 35S	Oryza sativa	monocot	Arabidopsis thaliana	dicot	No	-2	freezing	yes	cold-acclimated at 5°C for 10d	2h	mix													11.5741	3	18.5185	3	-0.470004	0.666667
30	Candida Vannini,et al.2004	OsMYB4	1	CaMV 35S	Oryza sativa	monocot	Arabidopsis thaliana	dicot	No	-4	freezing	yes	cold-acclimated at 5°C for 10d	2h	mix													11.5741	3	30.5556	3	-0.970779	0.666667
31	Candida Vannini,et al.2004	OsMYB4	1	CaMV 35S	Oryza sativa	monocot	Arabidopsis thaliana	dicot	No	-6	freezing	yes	cold-acclimated at 5°C for 10d	2h	mix													20.8333	3	43.5185	3	-0.736632	0.666667
32	Candida Vannini,et al.2004	OsMYB4	1	CaMV 35S	Oryza sativa	monocot	Arabidopsis thaliana	dicot	No	-8	freezing	yes	cold-acclimated at 5°C for 10d	2h	mix													26.3889	3	53.7037	3	-0.710539	0.666667
33	Candida Vannini,et al.2004	OsMYB4	1	CaMV 35S	Oryza sativa	monocot	Arabidopsis thaliana	dicot	No	-10	freezing	yes	cold-acclimated at 5°C for 10d	2h	mix													33.7963	3	65.2778	3	-0.6583	0.666667
34	Candida Vannini,et al.2004	OsMYB4	1	CaMV 35S	Oryza sativa	monocot	Arabidopsis thaliana	dicot	No	-12	severe freezing	yes	cold-acclimated at 5°C for 10d	2h	mix													39.3519	3	71.7593	3	-0.600774	0.666667
35	Candida Vannini,et al.2004	OsMYB4	1	CaMV 35S	Oryza sativa	monocot	Arabidopsis thaliana	dicot	No	-2	freezing	other	0d	2h	soild													13.4021	3	28.3505	3	-0.749237	0.666667
36	Candida Vannini,et al.2004	OsMYB4	1	CaMV 35S	Oryza sativa	monocot	Arabidopsis thaliana	dicot	No	-4	freezing	other	0d	2h	soild													37.457	3	50.5155	3	-0.299085	0.666667
37	Candida Vannini,et al.2004	OsMYB4	1	CaMV 35S	Oryza sativa	monocot	Arabidopsis thaliana	dicot	No	-6	freezing	other	0d	2h	soild													50.6873	3	62.3711	3	-0.207427	0.666667
38	Candida Vannini,et al.2004	OsMYB4	1	CaMV 35S	Oryza sativa	monocot	Arabidopsis thaliana	dicot	No	-8	freezing	other	0d	2h	soild													62.1993	3	73.7113	3	-0.169813	0.666667
39	Candida Vannini,et al.2004	OsMYB4	1	CaMV 35S	Oryza sativa	monocot	Arabidopsis thaliana	dicot	No	-10	freezing	other	0d	2h	soild													68.2131	3	80.4124	3	-0.164532	0.666667
40	Candida Vannini,et al.2004	OsMYB4	1	CaMV 35S	Oryza sativa	monocot	Arabidopsis thaliana	dicot	No	-12	severe freezing	other	0d	2h	soild													71.8213	3	93.8144	3	-0.267138	0.666667
41	Candida Vannini,et al.2004	OsMYB4	1	CaMV 35S	Oryza sativa	monocot	Arabidopsis thaliana	dicot	No	-4	freezing	other	0d	1h	soild																			86.6407	3	72.7626	3	0.174567	0.666667
42	Candida Vannini,et al.2004	OsMYB4	1	CaMV 35S	Oryza sativa	monocot	Arabidopsis thaliana	dicot	No	-4	freezing	other	0d	2h	soild																			78.4695	3	60.7004	3	0.25676	0.666667
43	Candida Vannini,et al.2004	OsMYB4	1	CaMV 35S	Oryza sativa	monocot	Arabidopsis thaliana	dicot	No	-4	freezing	other	0d	3h	soild																			73.2815	3	57.1984	3	0.247781	0.666667
44	Candida Vannini,et al.2004	OsMYB4	1	CaMV 35S	Oryza sativa	monocot	Arabidopsis thaliana	dicot	No	-4	freezing	other	0d	4h	soild																			66.7964	3	49.0272	3	0.309273	0.666667
45	Candida Vannini,et al.2004	OsMYB4	1	CaMV 35S	Oryza sativa	monocot	Arabidopsis thaliana	dicot	No	-4	freezing	other	0d	5h	soild																			58.7549	3	41.2451	3	0.353841	0.666667
46	Candida Vannini,et al.2004	OsMYB4	1	CaMV 35S	Oryza sativa	monocot	Arabidopsis thaliana	dicot	No	-4	freezing	other	0d	6h	soild																			53.1777	3	36.5759	3	0.37425	0.666667
47	Candida Vannini,et al.2004	OsMYB4	1	CaMV 35S	Oryza sativa	monocot	Arabidopsis thaliana	dicot	No	-4	freezing	other	0d	7h	soild																			44.7471	3	13.6187	3	1.18958	0.666667
48	Candida Vannini,et al.2004	OsMYB4	1	CaMV 35S	Oryza sativa	monocot	Arabidopsis thaliana	dicot	No	-4	freezing	yes	cold-acclimated at 5°C for 2d	1h	mix																			96.729	3	92.9907	3	0.039414	0.666667
49	Candida Vannini,et al.2004	OsMYB4	1	CaMV 35S	Oryza sativa	monocot	Arabidopsis thaliana	dicot	No	-4	freezing	yes	cold-acclimated at 5°C for 2d	2h	mix																			94.3925	3	84.5794	3	0.109771	0.666667
50	Candida Vannini,et al.2004	OsMYB4	1	CaMV 35S	Oryza sativa	monocot	Arabidopsis thaliana	dicot	No	-4	freezing	yes	cold-acclimated at 5°C for 2d	3h	mix																			91.1215	3	79.4393	3	0.137201	0.666667
51	Candida Vannini,et al.2004	OsMYB4	1	CaMV 35S	Oryza sativa	monocot	Arabidopsis thaliana	dicot	No	-4	freezing	yes	cold-acclimated at 5°C for 2d	4h	mix																			87.3832	3	74.2991	3	0.162204	0.666667
52	Candida Vannini,et al.2004	OsMYB4	1	CaMV 35S	Oryza sativa	monocot	Arabidopsis thaliana	dicot	No	-4	freezing	yes	cold-acclimated at 5°C for 2d	5h	mix																			81.3084	3	68.2243	3	0.175449	0.666667
53	Candida Vannini,et al.2004	OsMYB4	1	CaMV 35S	Oryza sativa	monocot	Arabidopsis thaliana	dicot	No	-4	freezing	yes	cold-acclimated at 5°C for 2d	6h	mix																			80.3738	3	47.1963	3	0.532374	0.666667
54	Candida Vannini,et al.2004	OsMYB4	1	CaMV 35S	Oryza sativa	monocot	Arabidopsis thaliana	dicot	No	-4	freezing	yes	cold-acclimated at 5°C for 2d	7h	mix																			68.6916	3	33.1776	3	0.727753	0.666667
55	Candida Vannini,et al.2004	OsMYB4	1	CaMV 35S	Oryza sativa	monocot	Arabidopsis thaliana	dicot	No	-4	freezing	yes	cold-acclimated at 5°C for 6d	1h	soild																			95.3271	3	92.9907	3	0.0248152	0.666667
56	Candida Vannini,et al.2004	OsMYB4	1	CaMV 35S	Oryza sativa	monocot	Arabidopsis thaliana	dicot	No	-4	freezing	yes	cold-acclimated at 5°C for 6d	2h	soild																			92.5234	3	84.5794	3	0.08977	0.666667
57	Candida Vannini,et al.2004	OsMYB4	1	CaMV 35S	Oryza sativa	monocot	Arabidopsis thaliana	dicot	No	-4	freezing	yes	cold-acclimated at 5°C for 6d	3h	soild																			87.3832	3	79.4393	3	0.0953102	0.666667
58	Candida Vannini,et al.2004	OsMYB4	1	CaMV 35S	Oryza sativa	monocot	Arabidopsis thaliana	dicot	No	-4	freezing	yes	cold-acclimated at 5°C for 6d	4h	soild																			83.6449	3	74.2991	3	0.118482	0.666667
59	Candida Vannini,et al.2004	OsMYB4	1	CaMV 35S	Oryza sativa	monocot	Arabidopsis thaliana	dicot	No	-4	freezing	yes	cold-acclimated at 5°C for 6d	5h	soild																			75.7009	3	68.2243	3	0.10399	0.666667
60	Candida Vannini,et al.2004	OsMYB4	1	CaMV 35S	Oryza sativa	monocot	Arabidopsis thaliana	dicot	No	-4	freezing	yes	cold-acclimated at 5°C for 6d	6h	soild																			69.6262	3	47.1963	3	0.388826	0.666667
61	Candida Vannini,et al.2004	OsMYB4	1	CaMV 35S	Oryza sativa	monocot	Arabidopsis thaliana	dicot	No	-4	freezing	yes	cold-acclimated at 5°C for 6d	7h	soild																			53.7383	3	33.1776	3	0.482252	0.666667
62	Candida Vannini,et al.2004	OsMYB4	1	CaMV 35S	Oryza sativa	monocot	Arabidopsis thaliana	dicot	No	-4	freezing	yes	cold-acclimated at 5°C for 10d	1h	soild																			96.729	3	92.9907	3	0.039414	0.666667
63	Candida Vannini,et al.2004	OsMYB4	1	CaMV 35S	Oryza sativa	monocot	Arabidopsis thaliana	dicot	No	-4	freezing	yes	cold-acclimated at 5°C for 10d	2h	soild																			91.5888	3	84.5794	3	0.0796176	0.666667
64	Candida Vannini,et al.2004	OsMYB4	1	CaMV 35S	Oryza sativa	monocot	Arabidopsis thaliana	dicot	No	-4	freezing	yes	cold-acclimated at 5°C for 10d	3h	soild																			86.4486	3	79.4393	3	0.0845574	0.666667
65	Candida Vannini,et al.2004	OsMYB4	1	CaMV 35S	Oryza sativa	monocot	Arabidopsis thaliana	dicot	No	-4	freezing	yes	cold-acclimated at 5°C for 10d	4h	soild																			81.7757	3	74.2991	3	0.0958818	0.666667
66	Candida Vannini,et al.2004	OsMYB4	1	CaMV 35S	Oryza sativa	monocot	Arabidopsis thaliana	dicot	No	-4	freezing	yes	cold-acclimated at 5°C for 10d	5h	soild																			78.5047	3	68.2243	3	0.140357	0.666667
67	Candida Vannini,et al.2004	OsMYB4	1	CaMV 35S	Oryza sativa	monocot	Arabidopsis thaliana	dicot	No	-4	freezing	yes	cold-acclimated at 5°C for 10d	6h	soild																			74.2991	3	47.1963	3	0.453784	0.666667
68	Candida Vannini,et al.2004	OsMYB4	1	CaMV 35S	Oryza sativa	monocot	Arabidopsis thaliana	dicot	No	-4	freezing	yes	cold-acclimated at 5°C for 10d	7h	soild																			68.6916	3	33.1776	3	0.727753	0.666667
69	Candida Vannini,et al.2004	OsMYB4	1	CaMV 35S	Oryza sativa	monocot	Arabidopsis thaliana	dicot	No	4	chilling	other	0d		soild																									6.54696	1	0.994475	1	1.88454	2

## Sheet: Non-stress 
Supporting Information 1. Details on the MYB-overexpression studies used in the meta-analyses, including each of the moderators used for categorical analyses, the transgenic and untransformed control means, sample sizes (n) and the value of the natural log (ln) of the response ratio with corresponding non-parametric variances.
		Moderators
		Transformation			Gene donor		Gene recipient			Low temperature					Experimental conditions	Anthocyanin content (Abs/g FW)						Relative electrolyte leakage (REL)						Fv/Fm
Study No.	Publication	Gene member	Gene number	Promoters	Donor genus	Donor type	Recipient genus	Recipient type	Donor and recipient genus same	Low temperature ℃	Stress severity	Acclimated or not	Acclimated detials	time	Treatment Media	Mean trans	n trans	Mean non-trans	n non-trans	In R anthocyanin content	variance anthocyanin content	Mean trans	n trans	Mean non-trans	n non-trans	ln R relative electrolyte leakage	variance relative electrolyte leakage	Mean trans	n trans	Mean non-trans	n non-trans	ln R Fv/Fm	variance Fv/Fm
1	Haifeng Xu.et.al.2018.	MdMYB15L	1	CaMV 35S	Malus domesica Borkh	dicot	Malus domesica Borkh	dicot	Yes	25	normal	other	0d	14d	soild	1.17931	3	1.24138	3	-0.0512933	0.666667
2	Haifeng Xu.et.al.2018.	MdMYB15L+bHLH33	2	CaMV 35S	Malus domesica Borkh	dicot	Malus domesica Borkh	dicot	Yes	25	normal	other	0d	14d	soild	1.11724	3	1.24138	3	-0.105361	0.666667
3	Haifeng Xu.et.al.2018.	LBSMdMYB15L+bHLH33	2	CaMV 35S	Malus domesica Borkh	dicot	Malus domesica Borkh	dicot	Yes	25	normal	other	0d	14d	soild	1.53621	3	1.24138	3	0.213093	0.666667
4	X.Meng,et al.2014	LeAN2	1	CaMV 35S	Lycopersicum esculentum	dicot	Nicotiana tabacum	dicot	No	4	chilling	other	0d	0h	soil													0.856667	4	0.84	4	0.019647	0.5
5	X.Meng,et al.2014	LeAN2	1	CaMV 35S	Lycopersicum esculentum	dicot	Nicotiana tabacum	dicot	No	4	chilling	other	0d	0h	soil							17.4767	4	17.43	4	0.0026738	0.5
6	Candida Vannini,et al.2004	OsMYB4	1	CaMV 35S	Oryza sativa	monocot	Arabidopsis thaliana	dicot	No	0	chilling	other	0d	2h	mix							10.1852	3	8.7963	3	0.146603	0.666667
7	Candida Vannini,et al.2004	OsMYB4	1	CaMV 35S	Oryza sativa	monocot	Arabidopsis thaliana	dicot	No	0	chilling	other	0d	2h	mix							8.7963	3	8.7963	3	0	0.666667
8	Candida Vannini,et al.2004	OsMYB4	1	CaMV 35S	Oryza sativa	monocot	Arabidopsis thaliana	dicot	No	0	chilling	other	0d	2h	mix							11.1111	3	8.7963	3	0.233615	0.666667
9	Candida Vannini,et al.2004	OsMYB4	1	CaMV 35S	Oryza sativa	monocot	Arabidopsis thaliana	dicot	No	0	chilling	other	0d	2h	soild							3.95189	3	5.15464	3	-0.265703	0.666667
10	Candida Vannini,et al.2004	OsMYB4	1	CaMV 35S	Oryza sativa	monocot	Arabidopsis thaliana	dicot	No	-4	freezing	other	0d	0h	soild													99.6109	3	98.4436	3	0.011788	0.666667
11	Candida Vannini,et al.2004	OsMYB4	1	CaMV 35S	Oryza sativa	monocot	Arabidopsis thaliana	dicot	No	-4	freezing	other	0d	0h	mix													100	3	100	3	0	0.666667
12	Candida Vannini,et al.2004	OsMYB4	1	CaMV 35S	Oryza sativa	monocot	Arabidopsis thaliana	dicot	No	-4	freezing	other	0d	0h	soild													100	3	100	3	0	0.666667
13	Candida Vannini,et al.2004	OsMYB4	1	CaMV 35S	Oryza sativa	monocot	Arabidopsis thaliana	dicot	No	-4	freezing	other	0d	0h	soild													100	3	100	3	0	0.666667

## Sheet: Figure 4 change percentage
Figure 4															Figure 7					Figure 8					Figure 9
Relative electrolyte leakage		Point estimate	Change%												Germination		Point estimate	changes%		Root length		Point estimate	changes%		Fresh weight		Point estimate	changes
Stress severity	chilling	-0.323	-27.6026												Treatment media	Other	0.478	61.2845		Donor genus	Fraxinus	0.563	75.5932		Donor genus	Scutellaria	0.725
	freezing	-0.388	-32.1588													Liquid	0.485	62.4175			Scutellaria	0.52	68.2028			Other	-0.001
	severe freezing	-0.352	-29.672													Solid	0.376	45.6447			Other	0.041	4.18521		Recipient genus	Nicotiana tabacum	0.725
Acclimated or not	No	-0.312	-26.8018												Donor genus	Malus domesica	0.478	61.2845		Donor type	Monocot	0.531	70.0632			Other	-0.001
	Yes	-0.406	-33.369													Oryza sativa	0.378	45.9363			Dicot	0.036	3.66558		Donor and recipient genus same	Yes	-0.001
Acclimated details	0d	-0.312	-26.8018													Other	0.407	50.2304		Recipient genus	Arabidopsis thaliana	-0.021	-2.0781			No	0.725
	cold-acclimated at 5°C for 2d	-0.088	-8.42391												Donor type	Dicot	0.448	56.5179			Nicotiana tabacum	0.53	69.8932
	cold-acclimated at 5°C for 6d	-0.438	-35.4674													Monocot	0.378	45.9363		Stress severity	High	0.965	162.479
	cold-acclimated at 5°C for 10d	-0.691	-49.8925												Recipient genus	Arabidopsis thaliana	0.394	48.2901			Medium	0.295	34.3126
Treatment meida	soil	-0.323	-27.6026													Nicotiana	0.478	61.2845			Low	0.32	37.7128
	solid	-0.31	-26.6553												Donor and recipient genus same	No	0.441	55.4261		Stress time	2-10d	0.525	69.0459
	mix	-0.406	-33.369													yes	0.107	11.2934			11-20d	-0.278	-24.2703
															Stress severity	Low	0.422	52.5009			＞20d	0.578	78.247
																Medium	0.45	56.8312
