# Supplementary material for: Meta-analysis of the effect of expression of MYB transcription factor genes on abiotic stress
Source: PeerJ. 2021 Jun 8;9:e11268. doi: 10.7717/peerj.11268 (PMC8194419; doi:10.7717/peerj.11268)
Supplement: Supplemental Information 4 [file peerj-09-11268-s004.xlsx]

## Sheet: Effect sizes
Moderator	Level
Cold stress
Treatment media	medium	mix（medium+liquid/soil）	liquid	soil
Stress severity	normal(25)	low(10~25)	chilling(0~10)	freezing(-10~-1)	severe freezing(-20~-11)
Duration of exposure to temperature stress	0h-24h	1-6d	＞6d
Stress type	other	A	B	C	D
Receptor type	dicot	monocot
Receptor genus	other	A	B	C	D
	dicot	monocot
Donor genus	other	A	B	C	D
Donor and receptor genus same	yes	no
Low temperature	＜-10℃	0℃- -10℃	＞0℃
Drought stress
Treatment media	medium	mix（medium+liquid/soil）	liquid	soil
Stress severity	PEG	Mannitol	drought	severe frought
Duration of exposure to temperature stress	0-1h	1h-6h	6h-24h	1d-10d	11d-20d	＞20d
Stress type	other	A	B	C	D
Receptor type	dicot	monocot
Receptor genus	other	A	B	C	D
Donor type	dicot	monocot
Donor genus	other	A	B	C	D
Donor and receptor genus same	yes	no
Salt stress
Treatment media	medium	mix（medium+liquid/soil）	liquid	soil
Stress severity	low＜100mM	medium 100-200 mM	high＞200mM
Duration of exposure to temperature stress	0-1d	1-10d	11-20d	21-40d	＞40d
Stress type	other	A	B	C	D
Receptor type	dicot	monocot
Receptor genus	other	A	B	C	D
Donor type	dicot	monocot
Donor genus	other	A	B	C	D
Donor and receptor genus same	yes	no

## Sheet: Drought stress
Supporting Information 3. Details on the MYB-overexpression studies used in the meta-analyses under drought stress conditions, including each of the moderators used for categorical analyses, the transgenic and untransformed control means, sample sizes (n) and the value of the natural log (ln) of the response ratio with corresponding non-parametric variances.
		Moderators												EFFECT SIZES
		Transformation			Gene donor		Gene recipient			Drought stress			Experimental conditions	Survival						Root length						Shoot fresh weight (g)						Shoot length						Relative Electrolyte leakage (REL)						Proline content(ug/mg FW)
Study No.	Publication	Gene member	Gene number	Promoters	Donor genus	Donor type	Recipient genus	Recipient type	Donor and recipient genus same	Drought stress (mM)	Stress severity	Time	Treatment Media	Mean trans	n trans	Mean non-trans	n non-trans	ln R survival	variance survival	Mean trans	n trans	Mean non-trans	n non-trans	ln R root length	variance root length	Mean trans	n trans	Mean non-trans	n non-trans	ln R shoot fresh weight	variance shoot fresh weight	Mean trans	n trans	Mean non-trans	n non-trans	ln R shoot length	variance shoot length	Mean trans	n trans	Mean non-trans	n non-trans	ln R electrolyte leakage	variance electrolyte leakage	Mean trans	n trans	Mean non-trans	n non-trans	ln R proline content	variance proline content
1	Fei Gao et.al.2017	FtMYB9	1	CaMV 35S	Fagopyum Talaricum	dicot	Arabidopsis thaliana	dicot	No	300mM	mannitol	2-10d	medium							2.29684	3	0.788321	3	1.06938	0.666667
2	Fei Gao et.al.2017	FtMYB9	1	CaMV 35S	Fagopyum Talaricum	dicot	Arabidopsis thaliana	dicot	No	without watering	drought	＜2d
3	Fei Gao et.al.2017	FtMYB9	1	CaMV 35S	Fagopyum Talaricum	dicot	Arabidopsis thaliana	dicot	No	without watering	drought	＜2d
4	Fei Gao et.al.2017	FtMYB9	1	CaMV 35S	Fagopyum Talaricum	dicot	Arabidopsis thaliana	dicot	No	without watering	drought	＜2d
5	Fei Gao et.al.2017	FtMYB9	1	CaMV 35S	Fagopyum Talaricum	dicot	Arabidopsis thaliana	dicot	No	without watering	drought	＜2d
6	Fei Gao et.al.2017	FtMYB9	1	CaMV 35S	Fagopyum Talaricum	dicot	Arabidopsis thaliana	dicot	No	without watering	drought	＜2d
7	Fei Gao et.al.2017	FtMYB9	1	CaMV 35S	Fagopyum Talaricum	dicot	Arabidopsis thaliana	dicot	No	without watering	drought	＜2d
8	Fei Gao et.al.2017	FtMYB9	1	CaMV 35S	Fagopyum Talaricum	dicot	Arabidopsis thaliana	dicot	No	without watering	drought	＞20d	soil	0.851572	20	0.101887	20	2.12322	0.1																									340.887	3	189.163	3	0.588943	0.666667
9	Xuming Yin et.al.2017	OsMYBR1	1	CaMV 35S	Oryza sativa	monocot	Oryza sativa	monocot	YES	without watering	drought	2-10d	mix	0.433992	6	0.182609	6	0.865681	0.333333
10	Xuming Yin et.al.2017	OsMYBR1	1	CaMV 35S	Oryza sativa	monocot	Oryza sativa	monocot	YES	without watering	drought	2-10d	medium																															307.5	3	145.3	3	0.749675	0.666667
11	Yan Wang et al.2017	ZmMYB48	1	CaMV 35S	Zea mays	monocot	Arabidopsis thaliana	dicot	No	without watering	drought	11-20d	medium	64.9376	3	32.0461	3	0.70625	0.666667																			42.8148	3	70.8889	3	-0.50423	0.666667	139.116	3	89.6386	3	0.439526	0.666667
12	Yong-Tao Yu et al.2016	MYB37	1	CaMV 35S	Arabidopsis thaliana	dicot	Arabidopsis thaliana	dicot	Yes	without watering	drought	＜2d	medium
13	Yong-Tao Yu et al.2016	MYB37	1	CaMV 35S	Arabidopsis thaliana	dicot	Arabidopsis thaliana	dicot	Yes	without watering	drought	＜2d	medium
14	Yong-Tao Yu et al.2016	MYB37	1	CaMV 35S	Arabidopsis thaliana	dicot	Arabidopsis thaliana	dicot	Yes	without watering	drought	＜2d	medium
15	Yong-Tao Yu et al.2016	MYB37	1	CaMV 35S	Arabidopsis thaliana	dicot	Arabidopsis thaliana	dicot	Yes	without watering	drought	＜2d	medium
16	Yong-Tao Yu et al.2016	MYB37	1	CaMV 35S	Arabidopsis thaliana	dicot	Arabidopsis thaliana	dicot	Yes	without watering	drought	＜2d	medium
17	Yong-Tao Yu et al.2016	MYB37	1	CaMV 35S	Arabidopsis thaliana	dicot	Arabidopsis thaliana	dicot	Yes	without watering	drought	＜2d	medium
18	Yong-Tao Yu et al.2016	MYB37	1	CaMV 35S	Arabidopsis thaliana	dicot	Arabidopsis thaliana	dicot	Yes	without watering	drought	11-20d	soil	63.7427	3	32.7485	3	0.665996	0.666667
19	Haiyan Xiong et al.2014	OsMYB48-1	1	CaMV 35S	Oryza sativa	monocot	Oryza sativa	monocot	Yes	200mM	mannitol	2-10d	medium																			71.3333	30	58.5	30	0.198337	0.0666667
20	Haiyan Xiong et al.2014	OsMYB48-1	1	CaMV 35S	Oryza sativa	monocot	Oryza sativa	monocot	Yes	0.2	PEG6000	2-10d	liquid	89.7849	3	57.7957	3	0.440503	0.666667
21	Haiyan Xiong et al.2014	OsMYB48-1	1	CaMV 35S	Oryza sativa	monocot	Oryza sativa	monocot	Yes	without watering	drought	2-10d	soil	54.5699	20	15.3226	20	1.27015	0.1
22	Haiyan Xiong et al.2014	OsMYB48-1	1	CaMV 35S	Oryza sativa	monocot	Oryza sativa	monocot	Yes	without watering	drought	＜2d	soil
23	Haiyan Xiong et al.2014	OsMYB48-1	1	CaMV 35S	Oryza sativa	monocot	Oryza sativa	monocot	Yes	without watering	drought	＜2d	soil
24	Haiyan Xiong et al.2014	OsMYB48-1	1	CaMV 35S	Oryza sativa	monocot	Oryza sativa	monocot	Yes	without watering	drought	＜2d	soil
25	Haiyan Xiong et al.2014	OsMYB48-1	1	CaMV 35S	Oryza sativa	monocot	Oryza sativa	monocot	Yes	without watering	drought	＜2d	soil
26	Haiyan Xiong et al.2014	OsMYB48-1	1	CaMV 35S	Oryza sativa	monocot	Oryza sativa	monocot	Yes	without watering	drought	＜2d	soil
27	Haiyan Xiong et al.2014	OsMYB48-1	1	CaMV 35S	Oryza sativa	monocot	Oryza sativa	monocot	Yes	without watering	drought	＜2d	soil
28	Haiyan Xiong et al.2014	OsMYB48-1	1	CaMV 35S	Oryza sativa	monocot	Oryza sativa	monocot	Yes	without watering	drought	＜2d	soil
29	Haiyan Xiong et al.2014	OsMYB48-1	1	CaMV 35S	Oryza sativa	monocot	Oryza sativa	monocot	Yes	without watering	drought	2-10d																																780.908	4	582.16	4	0.293712	0.5
30	Yuxiang Qin et al.2012	TaMYB33	1	CaMV 35S	Triticum aestivum	monocot	Arabidopsis thaliana	dicot	No	50mM	mannitol	2-10d	medium							2.21329	3	1.86713	3	0.170075	0.666667
31	Im, Ju Sung et al.2012	StMYB1R-1	1	CaMV 35S	Solanum tuberosum	dicot	Solanum tuberosum	dicot	YES	without watering	drought	2-10d	soil
32	Im, Ju Sung et al.2012	StMYB1R-1	1	CaMV 35S	Solanum tuberosum	dicot	Solanum tuberosum	dicot	YES	without watering	severe frought	11-20d	soil
33	Park, Min Young et al.2012	AtMYB52	1	CaMV 35S	Arabidopsis thaliana	dicot	Arabidopsis thaliana	dicot	Yes	without watering	drought	11-20d	soil	66.2857	20	11.4286	20	1.75786	0.1
34	Park, Min Young et al.2012	AtMYB52	1	CaMV 35S	Arabidopsis thaliana	dicot	Arabidopsis thaliana	dicot	Yes	without watering	drought	11-20d	soil	76.8383	20	4.7377	20	2.78615	0.1
35	Xiaoyan Dai et al.2007	OsMYB3R-2	1	CaMV 35S	Oryza sativa	monocot	Arabidopsis thaliana	dicot	No	without watering	drought	＜2d	soil
36	Xiaoyan Dai et al.2007	OsMYB3R-2	1	CaMV 35S	Oryza sativa	monocot	Arabidopsis thaliana	dicot	No	without watering	drought	＜2d	soil
37	Xiaoyan Dai et al.2007	OsMYB3R-2	1	CaMV 35S	Oryza sativa	monocot	Arabidopsis thaliana	dicot	No	without watering	drought	＜2d	soil
38	Xiaoyan Dai et al.2007	OsMYB3R-2	1	CaMV 35S	Oryza sativa	monocot	Arabidopsis thaliana	dicot	No	without watering	drought	＜2d	soil
39	Xiaoyan Dai et al.2007	OsMYB3R-2	1	CaMV 35S	Oryza sativa	monocot	Arabidopsis thaliana	dicot	No	without watering	drought	＜2d	soil
40	Xiaoyan Dai et al.2007	OsMYB3R-2	1	CaMV 35S	Oryza sativa	monocot	Arabidopsis thaliana	dicot	No	without watering	drought	＜2d	soil
41	Xiaoyan Dai et al.2007	OsMYB3R-2	1	CaMV 35S	Oryza sativa	monocot	Arabidopsis thaliana	dicot	No	without watering	drought	＜2d	soil
42	Xiaoyan Dai et al.2007	OsMYB3R-2	1	CaMV 35S	Oryza sativa	monocot	Arabidopsis thaliana	dicot	No	without watering	drought	＜2d	soil
43	Xiaoyan Dai et al.2007	OsMYB3R-2	1	CaMV 35S	Oryza sativa	monocot	Arabidopsis thaliana	dicot	No	without watering	drought	＜2d	soil
44	Xiaoyan Dai et al.2007	OsMYB3R-2	1	CaMV 35S	Oryza sativa	monocot	Arabidopsis thaliana	dicot	No	without watering	drought	11-20d	soil	93.8889	60	26.7	60	1.25745	0.0333333
45	Chan Young Jeong et al.2018	AtMYBL-O	1	CaMV 35S	Arabidopsis thaliana	dicot	Arabidopsis thaliana	dicot	Yes	200mM	mannitol	11-20d	medium							3.97765	15	7.30726	15	-0.608177	0.133333
46	Chan Young Jeong et al.2018	AtMYBL-O	1	CaMV 35S	Arabidopsis thaliana	dicot	Arabidopsis thaliana	dicot	Yes	300mM	mannitol	11-20d	medium							1.78771	15	3.41899	15	-0.648411	0.133333
47	Pushp Sheel Shukla,et al.2015	SbMYB15	1	CaMV 35S	Salicornia brachiata	dicot	Nicotiana tabacum	dicot	No	0.1	PEG6000	2-10d	mix							13.0767	3	11.33	3	0.143375	0.666667	0.52	3	0.28	3	0.619039	0.666667	6.5	3	5	3	0.262364	0.666667	53.4267	3	61.7	3	-0.143974	0.666667	5.64	3	1.67	3	1.21706	0.666667
48	Linjie Qi,et al.2015	SbMYB2	1	CaMV 35S	Scutellaria baicalensis	monocot	Nicotiana tabacum	dicot	No	200mM	mannitol	2-10d	medium							0.324786	10	0.47619	10	-0.38265	0.2
49	Linjie Qi,et al.2015	SbMYB7	1	CaMV 35S	Scutellaria baicalensis	monocot	Nicotiana tabacum	dicot	No	200mM	mannitol	2-10d	medium							0.310078	10	0.47619	10	-0.428996	0.2
50	Linjie Qi,et al.2015	SbMYB2	1	CaMV 35S	Scutellaria baicalensis	monocot	Nicotiana tabacum	dicot	No	200mM	mannitol	2-10d	medium							0.247863	10	0.228571	10	0.0810284	0.2
51	Linjie Qi,et al.2015	SbMYB7	1	CaMV 35S	Scutellaria baicalensis	monocot	Nicotiana tabacum	dicot	No	200mM	mannitol	2-10d	medium							0.333333	10	0.228571	10	0.377294	0.2
52	Linjie Qi,et al.2015	SbMYB2	1	CaMV 35S	Scutellaria baicalensis	monocot	Nicotiana tabacum	dicot	No	200mM	mannitol	2-10d	medium							0.632479	10	0.514286	10	0.206867	0.2
53	Linjie Qi,et al.2015	SbMYB7	1	CaMV 35S	Scutellaria baicalensis	monocot	Nicotiana tabacum	dicot	No	200mM	mannitol	2-10d	medium							0.542636	10	0.514286	10	0.0536591	0.2
54	Peipei Sun,et al.2014	PtsrMYB	1	CaMV 35S	Poncirus trifoliata	dicot	Nicotiana Tabacum	dicot	No	without watering	drought	＜2d	medium
55	Peipei Sun,et al.2014	PtsrMYB	1	CaMV 35S	Poncirus trifoliata	dicot	Nicotiana Tabacum	dicot	No	without watering	drought	＜2d	medium
56	Peipei Sun,et al.2014	PtsrMYB	1	CaMV 35S	Poncirus trifoliata	dicot	Nicotiana Tabacum	dicot	No	without watering	drought	＜2d	medium
57	Peipei Sun,et al.2014	PtsrMYB	1	CaMV 35S	Poncirus trifoliata	dicot	Nicotiana Tabacum	dicot	No	without watering	drought	＜2d	medium
58	Peipei Sun,et al.2014	PtsrMYB	1	CaMV 35S	Poncirus trifoliata	dicot	Nicotiana Tabacum	dicot	No	without watering	drought	＜2d	medium
59	Peipei Sun,et al.2014	PtsrMYB	1	CaMV 35S	Poncirus trifoliata	dicot	Nicotiana Tabacum	dicot	No	without watering	drought	＜2d	medium
60	Jingbin Li,et al.2014	SpMYB	1	CaMV 35S	Solanum Pimpinellifolium	dicot	Nicotiana Tabacum	dicot	No	0.02	PEG	＞20d	medium							6.15476	3	2.5	3	0.900935	0.666667
61	Choonkyun Jung,et al.2008	AtMYB44	1	CaMV 35S	Arabidopsis thaliana	dicot	Arabidopsis thaliana	dicot	Yes	without watering	drought	＜2d
62	Choonkyun Jung,et al.2008	AtMYB44	1	CaMV 35S	Arabidopsis thaliana	dicot	Arabidopsis thaliana	dicot	Yes	without watering	drought	＜2d
63	Choonkyun Jung,et al.2008	AtMYB44	1	CaMV 35S	Arabidopsis thaliana	dicot	Arabidopsis thaliana	dicot	Yes	without watering	drought	＜2d
64	Choonkyun Jung,et al.2008	AtMYB44	1	CaMV 35S	Arabidopsis thaliana	dicot	Arabidopsis thaliana	dicot	Yes	without watering	drought	＜2d
65	Choonkyun Jung,et al.2008	AtMYB44	1	CaMV 35S	Arabidopsis thaliana	dicot	Arabidopsis thaliana	dicot	Yes	without watering	drought	＜2d
66	Choonkyun Jung,et al.2008	AtMYB44	1	CaMV 35S	Arabidopsis thaliana	dicot	Arabidopsis thaliana	dicot	Yes	without watering	drought	＜2d
67	Choonkyun Jung,et al.2008	AtMYB44	1	CaMV 35S	Arabidopsis thaliana	dicot	Arabidopsis thaliana	dicot	Yes	without watering	drought	＜2d
68	Choonkyun Jung,et al.2008	AtMYB44	1	CaMV 35S	Arabidopsis thaliana	dicot	Arabidopsis thaliana	dicot	Yes	without watering	drought	＜2d
69	Choonkyun Jung,et al.2008	AtMYB44	1	CaMV 35S	Arabidopsis thaliana	dicot	Arabidopsis thaliana	dicot	Yes	without watering	drought	＜2d
70	Choonkyun Jung,et al.2008	AtMYB44	1	CaMV 35S	Arabidopsis thaliana	dicot	Arabidopsis thaliana	dicot	Yes	without watering	drought	11-20d	soil	0.8667	10	0.17	10	1.62889	0.2
71	Mingzhu Dou,et al.2016	AmRosea1	1	CaMV 35S	Antirrhinum majus	dicot	Oryza sativa	monocot	No	without watering	drought	11-20d	mix	0.81	24	0.208	24	1.3595	0.0833333
[truncated: 36 more columns]

## Sheet: Non-stress
Supporting Information 1. Details on the MYB-overexpression studies used in the meta-analyses, including each of the moderators used for categorical analyses, the transgenic and untransformed control means, sample sizes (n) and the value of the natural log (ln) of the response ratio with corresponding non-parametric variances.
		Moderators
		Transformation			Gene donor		Gene recipient			Drought stress			Experimental conditions	Root length						Shoot fresh weight (g)						Shoot length						Relative Electrolyte leakage (REL)						Proline content (ug/mg FW)						Soluble sugar content (ug/mg FW)
Study No.	Publication	Gene member	Gene number	Promoters	Donor genus	Donor type	Recipient genus	Recipient type	Donor and recipient genus same	Drought stress (mM)	Stress severity	Time	Treatment Media	Mean trans	n trans	Mean non-trans	n non-trans	ln R root length	variance root length	Mean trans	n trans	Mean non-trans	n non-trans	ln R shoot fresh weight	variance shoot fresh weight	Mean trans	n trans	Mean non-trans	n non-trans	ln R shoot length	variance shoot length	Mean trans	n trans	Mean non-trans	n non-trans	ln R electrolyte leakage	variance electrolyte leakage	Mean trans	n trans	Mean non-trans	n non-trans	ln R proline	variance proline	Mean trans	n trans	Mean non-trans	n non-trans	ln R soluble sugar content	variance soluble sugar content
1	Fei Gao et.al.2017	FtMYB9	1	CaMV 35S	Fagopyum Talaricum	dicot	Arabidopsis thaliana	dicot	No	none	none	2-10d	medium	3.54258	3	3.38686	3	0.0449514	0.666667
2	Fei Gao et.al.2017	FtMYB9	2	CaMV 35S	Fagopyum Talaricum	dicot	Arabidopsis thaliana	dicot	No	without watering	drought	＜2d
3	Fei Gao et.al.2017	FtMYB9	3	CaMV 35S	Fagopyum Talaricum	dicot	Arabidopsis thaliana	dicot	No	none	none	＞20d	soil																									95.5665	3	65.0246	3	0.385056	0.666667
4	Xuming Yin et.al.2017	OsMYBR1	4	CaMV 35S	Oryza sativa	monocot	Oryza sativa	monocot	YES	none	none	2-10d	medium																									58.7649	3	55.7769	3	0.0521858	0.666667	1.47619	3	1.28571	3	0.13815	0.666667
5	Yan Wang et al.2017	ZmMYB48	5	CaMV 35S	Zea mays	monocot	Arabidopsis thaliana	dicot	No	none	none	11-20d	medium																			24.5926	3	22.2222	3	0.101352	0.666667	34.3775	3	31.8072	3	0.077709	0.666667
6	Yong-Tao Yu et al.2016	MYB37	6	CaMV 35S	Arabidopsis thaliana	dicot	Arabidopsis thaliana	dicot	Yes	without watering	drought	＜2d	medium
7	Haiyan Xiong et al.2014	OsMYB48-1	7	CaMV 35S	Oryza sativa	monocot	Oryza sativa	monocot	Yes	without watering	drought	＜2d	soil
8	Haiyan Xiong et al.2014	OsMYB48-1	8	CaMV 35S	Oryza sativa	monocot	Oryza sativa	monocot	Yes	none	none	2-10d																										35.9937	4	32.8638	4	0.0909718	0.5
9	Yuxiang Qin et al.2012	TaMYB33	9	CaMV 35S	Triticum aestivum	monocot	Arabidopsis thaliana	dicot	No	none	none	2-10d	medium	2.18662	3	2.19718	3	-0.00481929	0.666667
10	Im, Ju Sung et al.2012	StMYB1R-1	10	CaMV 35S	Solanum tuberosum	dicot	Solanum tuberosum	dicot	YES	without watering	none	2-10d	soil
11	Xiaoyan Dai et al.2007	OsMYB3R-2	11	CaMV 35S	Oryza sativa	monocot	Arabidopsis thaliana	dicot	No	none	none	＜2d	soil
12	Chan Young Jeong et al.2018	AtMYBL-O	12	CaMV 35S	Arabidopsis thaliana	dicot	Arabidopsis thaliana	dicot	Yes	none	none	11-20d	medium	9.2067	15	9.51955	15	-0.033416	0.133333
13	Chan Young Jeong et al.2018	AtMYBL-O	13	CaMV 35S	Arabidopsis thaliana	dicot	Arabidopsis thaliana	dicot	Yes	none	none	＞20d	soil							0.176239	5	0.398649	5	-0.816241	0.4
14	Pushp Sheel Shukla,et al.2015	SbMYB15	14	CaMV 35S	Salicornia brachiata	dicot	Nicotiana tabacum	dicot	No	0	none	2-10d	mix	17.22	3	14.17	3	0.194944	0.666667	2.21667	3	1.64	3	0.301308	0.666667	15.3867	3	13.4	3	0.138247	0.666667	22.1567	3	27.05	3	-0.199549	0.666667	0.46	3	0.35	3	0.273293	0.666667	2.68333	3	1.67	3	0.474236	0.666667
15	Linjie Qi,et al.2015	SbMYB2	15	CaMV 35S	Scutellaria baicalensis	monocot	Nicotiana tabacum	dicot	No	none	none	2-10d	medium	0.230769	10	0.228571	10	0.00956945	0.2
16	Linjie Qi,et al.2015	SbMYB7	16	CaMV 35S	Scutellaria baicalensis	monocot	Nicotiana tabacum	dicot	No	none	none	2-10d	medium	0.27907	10	0.228571	10	0.199613	0.2
17	Linjie Qi,et al.2015	SbMYB2	17	CaMV 35S	Scutellaria baicalensis	monocot	Nicotiana tabacum	dicot	No	none	none	2-10d	medium	0.367521	10	0.485714	10	-0.278839	0.2
18	Linjie Qi,et al.2015	SbMYB7	18	CaMV 35S	Scutellaria baicalensis	monocot	Nicotiana tabacum	dicot	No	none	none	2-10d	medium	0.612403	10	0.485714	10	0.23177	0.2
19	Linjie Qi,et al.2015	SbMYB2	19	CaMV 35S	Scutellaria baicalensis	monocot	Nicotiana tabacum	dicot	No	none	none	2-10d	medium	0.820513	10	0.990476	10	-0.188256	0.2
20	Linjie Qi,et al.2015	SbMYB7	20	CaMV 35S	Scutellaria baicalensis	monocot	Nicotiana tabacum	dicot	No	none	none	2-10d	medium	0.782946	10	0.990476	10	-0.235122	0.2
21	Peipei Sun,et al.2014	PtsrMYB	21	CaMV 35S	Poncirus trifoliata (L.)Raf	dicot	Nicotiana Tabacum	dicot	No	none	none	＜2d	medium
22	Choonkyun Jung,et al.2008	AtMYB44	22	CaMV 35S	Arabidopsis thaliana	dicot	Arabidopsis thaliana	dicot	Yes	without watering	drought	＜2d
[truncated: 30 more columns]

## Sheet: Figure 5 & 6 change percentage
Figure 5					Figure 6
Water loss		Point estimate	Change%		Survival		Point estimate	changes%
Donor genus	Arabidopsis thaliana	-0.276	-24.1187		Donor genus	Arabidopsis thaliana	1.883	557.319
	Oryza sativa	-0.268	-23.5092			other	1.352	286.515
	Other	-0.092	-8.78949		Donor type	dicot	1.846	533.443
Donor type	Monocot	-0.276	-24.1187			monocot	1.19	228.708
	Dicot	-0.212	-19.1035		Recipient genus	Arabidopsis thaliana	1.719	457.895
Recipient genus	Arabidopsis thaliana	-0.357	-30.0228			Oryza sativa	1.218	238.042
	Oryza sativa	-0.042	-4.11302		Recipient type	dicot	1.719	457.895
	Other	0.176	19.2438			monocot	1.218	238.042
Recipient type	Monocot	-0.042	-4.11302		Donor and recipient genus same	No	1.474	336.667
	Dicot	-0.304	-26.2139			yes	1.514	354.487
Donor and recipient genus same	No	-0.34	-28.823		stress time	2-10d	1.101	200.717
	Yes	-0.179	-16.3894			11-20d	1.593	391.848
Stress time	＜2d	-0.245	-21.7295			>20d	2.123	735.617
	Other	-0.264	-23.2026		Treatment Media	Other	1.146	214.559
Treatment media	Other	-0.293	-25.3978			Soil	1.72	458.453
	Solid	-0.05	-4.87706
	Soil	-0.26	-22.8948
