# Supplementary material for: Meta-analysis of the effect of expression of MYB transcription factor genes on abiotic stress
Source: PeerJ. 2021 Jun 8;9:e11268. doi: 10.7717/peerj.11268 (PMC8194419; doi:10.7717/peerj.11268)
Supplement: Supplemental Information 5 [file peerj-09-11268-s005.xlsx]

## Sheet: Salt stress
Supporting Information 4. Details on the MYB-overexpression studies used in the meta-analyses under salt stress conditions, including each of the moderators used for categorical analyses, the transgenic and untransformed control means, sample sizes (n) and the value of the natural log (ln) of the response ratio with corresponding non-parametric variances.
		Moderators												EFFECT SIZES
		Transformation			Gene donor		Gene recipient			Salt stress			Experimental conditions	Survival						Germination						Root length						Shoot fresh weight (g)						Shoot length						Proline content (ug/mg FW)
Study No.	Publication	Gene member	Gene number	Promoters	Donor genus	Donor type	Recipient genus	Recipient type	Donor and recipient genus same	Salt stress (mM)	Stress severity	Time	Treatment Media	Mean trans	n trans	Mean non-trans	n non-trans	ln R survival	variance survival	Mean trans	n trans	Mean non-trans	n non-trans	ln R germination	variance germination	Mean trans	n trans	Mean non-trans	n non-trans	ln R root length	variance root length	Mean trans	n trans	Mean non-trans	n non-trans	ln R shoot fresh weight	variance shoot fresh weight	Mean trans	n trans	Mean non-trans	n non-trans	ln R shoot length	variance shoot length	Mean trans	n trans	Mean non-trans	n non-trans	ln R proline content	variance proline content
1	Fei Gao et.al.2017	FtMYB9	1	CaMV 35S	Fagopyum Talaricum	dicot	Arabidopsis thaliana	dicot	No	150	medium	＜2d	medium							0	50	0	50	0	0.04
2	Fei Gao et.al.2017	FtMYB9	1	CaMV 35S	Fagopyum Talaricum	dicot	Arabidopsis thaliana	dicot	No	150	medium	2-10d	medium							0	50	0	50	0	0.04
3	Fei Gao et.al.2017	FtMYB9	1	CaMV 35S	Fagopyum Talaricum	dicot	Arabidopsis thaliana	dicot	No	150	medium	2-10d	medium							15.7962	50	0	50	0	0.04
4	Fei Gao et.al.2017	FtMYB9	1	CaMV 35S	Fagopyum Talaricum	dicot	Arabidopsis thaliana	dicot	No	150	medium	2-10d	medium							53.8854	50	9.17197	50	1.77071	0.04
5	Fei Gao et.al.2017	FtMYB9	1	CaMV 35S	Fagopyum Talaricum	dicot	Arabidopsis thaliana	dicot	No	150	medium	2-10d	medium							85.7325	50	55.0318	50	0.44332	0.04
6	Fei Gao et.al.2017	FtMYB9	1	CaMV 35S	Fagopyum Talaricum	dicot	Arabidopsis thaliana	dicot	No	150	medium	2-10d	medium							88.9172	50	59.6178	50	0.399751	0.04
7	Fei Gao et.al.2017	FtMYB9	1	CaMV 35S	Fagopyum Talaricum	dicot	Arabidopsis thaliana	dicot	No	150	medium	2-10d	medium							89.2994	50	60.7643	50	0.384991	0.04
8	Fei Gao et.al.2017	FtMYB9	1	CaMV 35S	Fagopyum Talaricum	dicot	Arabidopsis thaliana	dicot	No	150	medium	2-10d	medium													1.64477	3	0.875912	3	0.630089	0.666667
9	Fei Gao et.al.2017	FtMYB9	1	CaMV 35S	Fagopyum Talaricum	dicot	Arabidopsis thaliana	dicot	No	400	high	11-20d	soil	0.867925	20	0.2	20	1.46779	0.1																									455.172	3	221.675	3	0.719464	0.666667
10	Haiyan Xiong et al.2014	OsMYB48-1	1	CaMV 35S	Oryza sativa	monocot	Oryza sativa	monocot	Yes	150	medium	2-10d	medium																									36.4641	30	27.6243	30	0.277632	0.0666667
11	Yuxiang Qin et al.2012	TaMYB33	1	CaMV 35S	Triticum aestivum	monocot	Arabidopsis thaliana	dicot	No	50	low	2-10d	medium													1.91434	3	1.57343	3	0.196115	0.666667
12	Yuxiang Qin et al.2012	TaMYB33	1	CaMV 35S	Triticum aestivum	monocot	Arabidopsis thaliana	dicot	No	10	low	2-10d	medium													1.67517	3	1.59864	3	0.0467618	0.666667
13	Yuxiang Qin et al.2012	TaMYB33	1	CaMV 35S	Triticum aestivum	monocot	Arabidopsis thaliana	dicot	No	100	medium	2-10d	medium													1.69828	3	1.74138	3	-0.025064	0.666667
14	Xiaoyan Dai et al.2007	OsMYB3R-2	1	CaMV 35S	Oryza sativa	monocot	Arabidopsis thaliana	dicot	No	75	low	2-10d	medium													2.43478	3	1.18841	3	0.717245	0.666667
15	Xiaoyan Dai et al.2007	OsMYB3R-2	1	CaMV 35S	Oryza sativa	monocot	Arabidopsis thaliana	dicot	No	100	medium	2-10d	medium													2.11111	3	1.04348	3	0.704655	0.666667
16	Xiaoyan Dai et al.2007	OsMYB3R-2	1	CaMV 35S	Oryza sativa	monocot	Arabidopsis thaliana	dicot	No	150	medium	2-10d	medium													1.28019	3	0.347826	3	1.30306	0.666667
17	Xiaoyan Dai et al.2007	OsMYB3R-2	1	CaMV 35S	Oryza sativa	monocot	Arabidopsis thaliana	dicot	No	50	low	＜2d	medium							0	50	0	50	0	0.04
18	Xiaoyan Dai et al.2007	OsMYB3R-2	1	CaMV 35S	Oryza sativa	monocot	Arabidopsis thaliana	dicot	No	50	low	2-10d	medium							83.7246	50	34.7418	50	0.879589	0.04
19	Xiaoyan Dai et al.2007	OsMYB3R-2	1	CaMV 35S	Oryza sativa	monocot	Arabidopsis thaliana	dicot	No	50	low	2-10d	medium							95.9311	50	54.9296	50	0.557579	0.04
20	Xiaoyan Dai et al.2007	OsMYB3R-2	1	CaMV 35S	Oryza sativa	monocot	Arabidopsis thaliana	dicot	No	50	low	2-10d	medium							98.2786	50	62.4413	50	0.453579	0.04
21	Xiaoyan Dai et al.2007	OsMYB3R-2	1	CaMV 35S	Oryza sativa	monocot	Arabidopsis thaliana	dicot	No	50	low	2-10d	medium							100	50	69.9531	50	0.357346	0.04
22	Xiaoyan Dai et al.2007	OsMYB3R-2	1	CaMV 35S	Oryza sativa	monocot	Arabidopsis thaliana	dicot	No	75	low	＜2d	medium							0	50	0	50	0	0.04
23	Xiaoyan Dai et al.2007	OsMYB3R-2	1	CaMV 35S	Oryza sativa	monocot	Arabidopsis thaliana	dicot	No	75	low	2-10d	medium							0	50	0	50	0	0.04
24	Xiaoyan Dai et al.2007	OsMYB3R-2	1	CaMV 35S	Oryza sativa	monocot	Arabidopsis thaliana	dicot	No	75	low	2-10d	medium							63.1498	50	37.156	50	0.530386	0.04
25	Xiaoyan Dai et al.2007	OsMYB3R-2	1	CaMV 35S	Oryza sativa	monocot	Arabidopsis thaliana	dicot	No	75	low	2-10d	medium							79.5107	50	48.1651	50	0.501256	0.04
26	Xiaoyan Dai et al.2007	OsMYB3R-2	1	CaMV 35S	Oryza sativa	monocot	Arabidopsis thaliana	dicot	No	75	low	2-10d	medium							90.367	50	55.0459	50	0.495712	0.04
27	Chan Young Jeong et al.2018	AtMYBL-O	1	CaMV 35S	Arabidopsis thaliana	dicot	Arabidopsis thaliana	dicot	Yes	200	medium	2-10d	medium							1.1811	3	4.72441	3	-1.38629	0.666667
28	Chan Young Jeong et al.2018	AtMYBL-O	1	CaMV 35S	Arabidopsis thaliana	dicot	Arabidopsis thaliana	dicot	Yes	200	medium	2-10d	medium							7.48031	3	9.84252	3	-0.274437	0.666667
29	Chan Young Jeong et al.2018	AtMYBL-O	1	CaMV 35S	Arabidopsis thaliana	dicot	Arabidopsis thaliana	dicot	Yes	200	medium	2-10d	medium							22.0472	3	12.2047	3	0.591364	0.666667
30	Chan Young Jeong et al.2018	AtMYBL-O	1	CaMV 35S	Arabidopsis thaliana	dicot	Arabidopsis thaliana	dicot	Yes	200	medium	2-10d	medium							30.9055	3	19.2913	3	0.471278	0.666667
31	Chan Young Jeong et al.2018	AtMYBL-O	1	CaMV 35S	Arabidopsis thaliana	dicot	Arabidopsis thaliana	dicot	Yes	200	medium	2-10d	medium							39.7638	3	21.2598	3	0.626136	0.666667
32	Chan Young Jeong et al.2018	AtMYBL-O	1	CaMV 35S	Arabidopsis thaliana	dicot	Arabidopsis thaliana	dicot	Yes	200	medium	2-10d	medium							41.5354	3	22.4409	3	0.61566	0.666667
33	Chan Young Jeong et al.2018	AtMYBL-O	1	CaMV 35S	Arabidopsis thaliana	dicot	Arabidopsis thaliana	dicot	Yes	100	medium	11-20d	medium													5.2514	15	6.43575	15	-0.203375	0.133333
34	Chan Young Jeong et al.2018	AtMYBL-O	1	CaMV 35S	Arabidopsis thaliana	dicot	Arabidopsis thaliana	dicot	Yes	150	medium	11-20d	medium													1.60894	15	2.88268	15	-0.583146	0.133333
35	Yuxuan He et al.2018	GmMYB3a	1	CaMV 35S	Glycine max	dicot	Glycine max	dicot	Yes	200	medium	2-10d	medium																															231.702	3	323.617	3	-0.334108	0.666667
36	X.W.Li et al.2016	GmMYB12B2	1	CaMV 35S	Glycine max	dicot	Arabidopsis thaliana	dicot	No	50	low	2-10d	liquid							98.6939	100	97.4694	100	0.0124846	0.02
37	X.W.Li et al.2016	GmMYB12B2	1	CaMV 35S	Glycine max	dicot	Arabidopsis thaliana	dicot	No	100	medium	2-10d	liquid							56.3265	100	38.6939	100	0.375484	0.02
38	X.W.Li et al.2016	GmMYB12B2	1	CaMV 35S	Glycine max	dicot	Arabidopsis thaliana	dicot	No	150	medium	2-10d	liquid							15.6735	100	5.38776	100	1.06784	0.02
39	Tian Li,et al.2016	FvMYB1	1	CaMV 35S	Fraxinus velutina Torr	dicot	Nicotiana tabacum	dicot	No	50	medium	2-10d	medium													1.59504	3	1.57438	3	0.013038	0.666667	20.6311	3	20.534	3	0.00471699	0.666667
40	Tian Li,et al.2016	FvMYB1	1	CaMV 35S	Fraxinus velutina Torr	dicot	Nicotiana tabacum	dicot	No	100	medium	2-10d	medium													1.28926	3	0.880165	3	0.381711	0.666667	19.1262	3	13.5437	3	0.345139	0.666667
41	Tian Li,et al.2016	FvMYB1	1	CaMV 35S	Fraxinus velutina Torr	dicot	Nicotiana tabacum	dicot	No	150	medium	2-10d	medium													0.975207	3	0.644628	3	0.413976	0.666667	15.534	3	9.75728	3	0.465016	0.666667
42	Tian Li,et al.2016	FvMYB1	1	CaMV 35S	Fraxinus velutina Torr	dicot	Nicotiana tabacum	dicot	No	200	medium	2-10d	medium													0.491736	3	0.173554	3	1.04145	0.666667	7.52427	3	3.20388	3	0.85377	0.666667
43	Tian Li,et al.2016	FvMYB1	1	CaMV 35S	Fraxinus velutina Torr	dicot	Nicotiana tabacum	dicot	No	250	high	2-10d	medium													0.260331	3	0.0991736	3	0.965081	0.666667	3.4466	3	1.74757	3	0.679161	0.666667
44	Tian Li,et al.2016	FvMYB1	1	CaMV 35S	Fraxinus velutina Torr	dicot	Nicotiana tabacum	dicot	No	200	medium	2-10d	medium																															0.0562133	3	0.02464	3	0.824783	0.666667
45	Pushp Sheel Shukla,et al.2015	SbMYB15	1	CaMV 35S	Salicornia brachiata	dicot	Nicotiana tabacum	dicot	No	100	medium	2-10d	mix													10.4167	3	7.75	3	0.295714	0.666667	1.7	3	1.22	3	0.331777	0.666667	8.96	3	6.75	3	0.283228	0.666667	1.17	3	0.47	3	0.912026	0.666667
46	Pushp Sheel Shukla,et al.2015	SbMYB15	1	CaMV 35S	Salicornia brachiata	dicot	Nicotiana tabacum	dicot	No	200	medium	2-10d	mix													7.29667	3	5.38	3	0.304729	0.666667	0.706667	3	0.48	3	0.386773	0.666667	6.16667	3	4.38	3	0.34211	0.666667	1.92667	3	1.31	3	0.385764	0.666667
47	Pushp Sheel Shukla,et al.2015	SbMYB15	1	CaMV 35S	Salicornia brachiata	dicot	Nicotiana tabacum	dicot	No	50	low	2-10d	soil
48	Pushp Sheel Shukla,et al.2015	SbMYB15	1	CaMV 35S	Salicornia brachiata	dicot	Nicotiana tabacum	dicot	No	100	medium	2-10d	soil
49	Pushp Sheel Shukla,et al.2015	SbMYB15	1	CaMV 35S	Salicornia brachiata	dicot	Nicotiana tabacum	dicot	No	200	medium	2-10d	soil
50	Linjie Qi,et al.2015	SbMYB2	1	CaMV 35S	Scutellaria baicalensis	monocot	Nicotiana tabacum	dicot	No	150	medium	2-10d	medium													0.769231	10	0.257143	10	1.09576	0.2
51	Linjie Qi,et al.2015	SbMYB7	1	CaMV 35S	Scutellaria baicalensis	monocot	Nicotiana tabacum	dicot	No	150	medium	2-10d	medium													0.534884	10	0.257143	10	0.732418	0.2
52	Linjie Qi,et al.2015	SbMYB2	1	CaMV 35S	Scutellaria baicalensis	monocot	Nicotiana tabacum	dicot	No	150	medium	2-10d	medium													0.307692	10	0.352381	10	-0.135613	0.2
53	Linjie Qi,et al.2015	SbMYB7	1	CaMV 35S	Scutellaria baicalensis	monocot	Nicotiana tabacum	dicot	No	150	medium	2-10d	medium													0.604651	10	0.352381	10	0.539939	0.2
54	Linjie Qi,et al.2015	SbMYB2	1	CaMV 35S	Scutellaria baicalensis	monocot	Nicotiana tabacum	dicot	No	150	medium	2-10d	medium													0.735043	10	0.390476	10	0.632562	0.2
55	Linjie Qi,et al.2015	SbMYB7	1	CaMV 35S	Scutellaria baicalensis	monocot	Nicotiana tabacum	dicot	No	150	medium	2-10d	medium													0.503876	10	0.390476	10	0.254963	0.2
56	Linjie Qi,et al.2015	SbMYB2	1	CaMV 35S	Scutellaria baicalensis	monocot	Nicotiana tabacum	dicot	No	150	medium	2-10d	medium
57	Linjie Qi,et al.2015	SbMYB7	1	CaMV 35S	Scutellaria baicalensis	monocot	Nicotiana tabacum	dicot	No	150	medium	2-10d	medium
58	Linjie Qi,et al.2015	SbMYB2	1	CaMV 35S	Scutellaria baicalensis	monocot	Nicotiana tabacum	dicot	No	150	medium	2-10d	medium
59	Linjie Qi,et al.2015	SbMYB7	1	CaMV 35S	Scutellaria baicalensis	monocot	Nicotiana tabacum	dicot	No	150	medium	2-10d	medium
60	Linjie Qi,et al.2015	SbMYB2	1	CaMV 35S	Scutellaria baicalensis	monocot	Nicotiana tabacum	dicot	No	150	medium	2-10d	medium
61	Linjie Qi,et al.2015	SbMYB7	1	CaMV 35S	Scutellaria baicalensis	monocot	Nicotiana tabacum	dicot	No	150	medium	2-10d	medium
62	Rongkai Wang	MdSIMYB1	1	CaMV 35S	Malus domesica Borkh	dicot	Nicotiana tabacum	dicot	No	40	low	2-10d								0	50	0	50	0	0.04
63	Rongkai Wang	MdSIMYB1	1	CaMV 35S	Malus domesica Borkh	dicot	Nicotiana tabacum	dicot	No	40	low	2-10d								0	50	0	50	0	0.04
64	Rongkai Wang	MdSIMYB1	1	CaMV 35S	Malus domesica Borkh	dicot	Nicotiana tabacum	dicot	No	40	low	2-10d								15.0997	50	0	50	0	0.04
65	Rongkai Wang	MdSIMYB1	1	CaMV 35S	Malus domesica Borkh	dicot	Nicotiana tabacum	dicot	No	40	low	2-10d								31.339	50	11.1111	50	1.03692	0.04
66	Rongkai Wang	MdSIMYB1	1	CaMV 35S	Malus domesica Borkh	dicot	Nicotiana tabacum	dicot	No	40	low	2-10d								51.8519	50	19.6581	50	0.9699	0.04
67	Rongkai Wang	MdSIMYB1	1	CaMV 35S	Malus domesica Borkh	dicot	Nicotiana tabacum	dicot	No	40	low	2-10d								59.8291	50	31.6239	50	0.637577	0.04
68	Rongkai Wang	MdSIMYB1	1	CaMV 35S	Malus domesica Borkh	dicot	Nicotiana tabacum	dicot	No	40	low	2-10d								72.3647	50	31.6239	50	0.827804	0.04
69	Rongkai Wang	MdSIMYB1	1	CaMV 35S	Malus domesica Borkh	dicot	Nicotiana tabacum	dicot	No	40	low	2-10d								82.3362	50	37.6068	50	0.783625	0.04
70	Rongkai Wang	MdSIMYB1	1	CaMV 35S	Malus domesica Borkh	dicot	Nicotiana tabacum	dicot	No	80	low	2-10d								0	50	0	50	0	0.04
71	Rongkai Wang	MdSIMYB1	1	CaMV 35S	Malus domesica Borkh	dicot	Nicotiana tabacum	dicot	No	80	low	2-10d								0	50	0	50	0	0.04
72	Rongkai Wang	MdSIMYB1	1	CaMV 35S	Malus domesica Borkh	dicot	Nicotiana tabacum	dicot	No	80	low	2-10d								6.21469	50	0	50	0	0.04
73	Rongkai Wang	MdSIMYB1	1	CaMV 35S	Malus domesica Borkh	dicot	Nicotiana tabacum	dicot	No	80	low	2-10d								12.1469	50	6.77966	50	0.583146	0.04
74	Rongkai Wang	MdSIMYB1	1	CaMV 35S	Malus domesica Borkh	dicot	Nicotiana tabacum	dicot	No	80	low	2-10d								36.1582	50	16.9492	50	0.757686	0.04
75	Rongkai Wang	MdSIMYB1	1	CaMV 35S	Malus domesica Borkh	dicot	Nicotiana tabacum	dicot	No	80	low	2-10d								43.2203	50	22.0339	50	0.673729	0.04
76	Rongkai Wang	MdSIMYB1	1	CaMV 35S	Malus domesica Borkh	dicot	Nicotiana tabacum	dicot	No	80	low	2-10d								53.1073	50	27.1186	50	0.672094	0.04
77	Rongkai Wang	MdSIMYB1	1	CaMV 35S	Malus domesica Borkh	dicot	Nicotiana tabacum	dicot	No	80	low	2-10d								61.5819	50	30.5085	50	0.702364	0.04
78	Jingbin Li,et al.2014	SpMYB	1	CaMV 35S	Solanum Pimpinellifolium	dicot	Nicotiana tabacum	dicot	No	200	medium	＞20d	medium													5.28571	3	2.96429	3	0.578372	0.666667
79	Liqin Cheng,et al.2013	LcMYB1	1	CaMV 35S	Leymus chinensis	monocot	Arabidopsis thaliana	dicot	No	150	medium	＞20d	medium	67.3171	3	23.4146	3	1.05605	0.666667
80	Liqin Cheng,et al.2013	LcMYB1	1	CaMV 35S	Leymus chinensis	monocot	Arabidopsis thaliana	dicot	No	150	medium	2-10d	medium																															6.56051	3	4.90446	3	0.290924	0.666667
81	Choonkyun Jung,et al.2008	AtMYB44	1	CaMV 35S	Arabidopsis thaliana	dicot	Arabidopsis thaliana	dicot	Yes	300	high	＞20d	soil	0.8633	10	0.17	10	1.62496	0.2
82	Hye-Jung Lee,et al.2012	OsMLD	1	CaMV 35S	Oryza sativa	monocot	Oryza sativa	monocot	Yes	250	high	2-10d	medium																															7.8251	3	5.0038	3	0.447138	0.666667
83	Mingzhu Dou,et al.2016	AmRosea1	1	CaMV 35S	Antirrhinum majus	dicot	Oryza sativa	monocot	No	250	high	2-10d	mix	0.71333	24	0	24	0	0.0833333
[truncated: 54 more columns]

## Sheet: Non-stress
Supporting Information 1. Details on the MYB-overexpression studies used in the meta-analyses, including each of the moderators used for categorical analyses, the transgenic and untransformed control means, sample sizes (n) and the value of the natural log (ln) of the response ratio with corresponding non-parametric variances.
		Moderators											EFFECT SIZES
		Transformation			Gene donor		Gene recipient			Salt stress		Experimental conditions	Survival						Germination						Root length						Shoot fresh weight (g)						Shoot length						Proline content (ug/mg FW)						Chlorophyll content
Study No.	Publication	Gene member	Gene number	Promoters	Donor genus	Donor type	Recipient genus	Recipient type	Donor and recipient genus same	Salt stress (mM)	Time	Treatment Media	Mean trans	n trans	Mean non-trans	n non-trans	ln R survival	variance survival	Mean trans	n trans	Mean non-trans	n non-trans	ln R germination	variance germination	Mean trans	n trans	Mean non-trans	n non-trans	ln R root length	variance root length	Mean trans	n trans	Mean non-trans	n non-trans	ln R shoot fresh weight	variance shoot fresh weight	Mean trans	n trans	Mean non-trans	n non-trans	ln R shoot length	variance shoot length	Mean trans	n trans	Mean non-trans	n non-trans	ln R proline content	variance proline content	Mean trans
1	Fei Gao et.al.2017	FtMYB9	1	CaMV 35S	Fagopyum Talaricum	dicot	Arabidopsis thaliana	dicot	No	150	＜2d	medium							0	50	0	50	0	0.04
2	Fei Gao et.al.2017	FtMYB9	1	CaMV 35S	Fagopyum Talaricum	dicot	Arabidopsis thaliana	dicot	No	none	＜2d	medium							0	50	0	50	0	0.04
3	Fei Gao et.al.2017	FtMYB9	1	CaMV 35S	Fagopyum Talaricum	dicot	Arabidopsis thaliana	dicot	No	none	＜2d	medium							0	50	0	50	0	0.04
4	Fei Gao et.al.2017	FtMYB9	1	CaMV 35S	Fagopyum Talaricum	dicot	Arabidopsis thaliana	dicot	No	none	2-10d	medium							55.5911	50	97.7636	50	-0.56453	0.04
5	Fei Gao et.al.2017	FtMYB9	1	CaMV 35S	Fagopyum Talaricum	dicot	Arabidopsis thaliana	dicot	No	none	2-10d	medium							97.8914	50	100.064	50	-0.0219505	0.04
6	Fei Gao et.al.2017	FtMYB9	1	CaMV 35S	Fagopyum Talaricum	dicot	Arabidopsis thaliana	dicot	No	none	2-10d	medium							100.192	50	100.064	50	0.00127632	0.04
7	Fei Gao et.al.2017	FtMYB9	1	CaMV 35S	Fagopyum Talaricum	dicot	Arabidopsis thaliana	dicot	No	none	2-10d	medium							100.064	50	100.064	50	0	0.04
8	Fei Gao et.al.2017	FtMYB9	1	CaMV 35S	Fagopyum Talaricum	dicot	Arabidopsis thaliana	dicot	No	none	2-10d	medium							100.064	50	100.064	50	0	0.04
9	Fei Gao et.al.2017	FtMYB9	1	CaMV 35S	Fagopyum Talaricum	dicot	Arabidopsis thaliana	dicot	No	none	2-10d	medium							100.064	50	100.064	50	0	0.04
10	Fei Gao et.al.2017	FtMYB9	1	CaMV 35S	Fagopyum Talaricum	dicot	Arabidopsis thaliana	dicot	No	none	2-10d	medium													3.54258	3	3.38686	3	0.0449514	0.666667
11	Fei Gao et.al.2017	FtMYB9	1	CaMV 35S	Fagopyum Talaricum	dicot	Arabidopsis thaliana	dicot	No	none	11-20d	soil																															95.5665	3	15.2239	3	1.83696	0.666667
12	Yuxiang Qin et al.2012	TaMYB33	1	CaMV 35S	Triticum aestivum	monocot	Arabidopsis thaliana	dicot	No	none	2-10d	medium													2.18662	3	2.19718	3	-0.00481929	0.666667
13	Xiaoyan Dai et al.2007	OsMYB3R-2	1	CaMV 35S	Oryza sativa	monocot	Arabidopsis thaliana	dicot	No	0	2-10d	medium													2.69082	3	2.7971	3	-0.0387372	0.666667
14	Xiaoyan Dai et al.2007	OsMYB3R-2	1	CaMV 35S	Oryza sativa	monocot	Arabidopsis thaliana	dicot	No	none	2-10d	medium							0	50	0	50	0	0.04
15	Xiaoyan Dai et al.2007	OsMYB3R-2	1	CaMV 35S	Oryza sativa	monocot	Arabidopsis thaliana	dicot	No	none	2-10d	medium							85.9213	50	90.0621	50	-0.0470675	0.04
16	Xiaoyan Dai et al.2007	OsMYB3R-2	1	CaMV 35S	Oryza sativa	monocot	Arabidopsis thaliana	dicot	No	none	2-10d	medium							100	50	100	50	0	0.04
17	Xiaoyan Dai et al.2007	OsMYB3R-2	1	CaMV 35S	Oryza sativa	monocot	Arabidopsis thaliana	dicot	No	none	2-10d	medium							100	50	100	50	0	0.04
18	Xiaoyan Dai et al.2007	OsMYB3R-2	1	CaMV 35S	Oryza sativa	monocot	Arabidopsis thaliana	dicot	No	none	2-10d	medium							100	50	100	50	0	0.04
19	Xiaoyan Dai et al.2007	OsMYB3R-2	1	CaMV 35S	Oryza sativa	monocot	Arabidopsis thaliana	dicot	No	none	2-10d	medium							100	50	100	50	0	0.04
20	Chan Young Jeong et al.2018	AtMYBL-O	1	CaMV 35S	Arabidopsis thaliana	dicot	Arabidopsis thaliana	dicot	Yes	none	2-10d	medium							92.8571	3	97.2222	3	-0.0459371	0.666667
21	Chan Young Jeong et al.2018	AtMYBL-O	1	CaMV 35S	Arabidopsis thaliana	dicot	Arabidopsis thaliana	dicot	Yes	none	2-10d	medium							96.0317	3	97.2222	3	-0.0123205	0.666667
22	Chan Young Jeong et al.2018	AtMYBL-O	1	CaMV 35S	Arabidopsis thaliana	dicot	Arabidopsis thaliana	dicot	Yes	none	2-10d	medium							96.8254	3	97.2222	3	-0.00408999	0.666667
23	Chan Young Jeong et al.2018	AtMYBL-O	1	CaMV 35S	Arabidopsis thaliana	dicot	Arabidopsis thaliana	dicot	Yes	none	2-10d	medium							97.2222	3	97.619	3	-0.00407333	0.666667
24	Chan Young Jeong et al.2018	AtMYBL-O	1	CaMV 35S	Arabidopsis thaliana	dicot	Arabidopsis thaliana	dicot	Yes	none	2-10d	medium							97.619	3	98.0159	3	-0.0040568	0.666667
25	Chan Young Jeong et al.2018	AtMYBL-O	1	CaMV 35S	Arabidopsis thaliana	dicot	Arabidopsis thaliana	dicot	Yes	none	2-10d	medium							97.8175	3	98.0159	3	-0.00202634	0.666667
26	Chan Young Jeong et al.2018	AtMYBL-O	1	CaMV 35S	Arabidopsis thaliana	dicot	Arabidopsis thaliana	dicot	Yes	none	11-20d	medium													9.2067	15	9.51955	15	-0.033416	0.133333
27	Yuxuan He et al.2018	GmMYB3a	1	CaMV 35S	Glycine max	dicot	Glycine max	dicot	Yes	none	2-10d	medium																															216.383	3	250.851	3	-0.14781	0.666667	7.77
28	X.W.Li et al.2016	GmMYB12B2	1	CaMV 35S	Glycine max	dicot	Arabidopsis thaliana	dicot	No	0	2-10d	liquid							99.1837	100	97.9592	100	0.0124225	0.02
29	Tian Li,et al.2016	FvMYB1	1	CaMV 35S	Fraxinus velutina Torr	dicot	Nicotiana tabacum	dicot	No	0	2-10d	medium													1.94628	3	2.03306	3	-0.0436206	0.666667	25.3883	3	23.5922	3	0.0733728	0.666667
30	Pushp Sheel Shukla,et al.2015	SbMYB15	1	CaMV 35S	Salicornia brachiata	dicot	Nicotiana tabacum	dicot	No	0	11-20d	mix													11.5867	3	9.75	3	0.172588	0.666667	1.91333	3	1.51	3	0.236737	0.666667	11.3767	3	10.13	3	0.116063	0.666667	0.24	3	0.16	3	0.405465	0.666667
31	Pushp Sheel Shukla,et al.2015	SbMYB15	1	CaMV 35S	Salicornia brachiata	dicot	Nicotiana tabacum	dicot	No	none	＜2d	soil
32	Pushp Sheel Shukla,et al.2015	SbMYB15	1	CaMV 35S	Salicornia brachiata	dicot	Nicotiana tabacum	dicot	No	0	＜2d	soil
33	Pushp Sheel Shukla,et al.2015	SbMYB15	1	CaMV 35S	Salicornia brachiata	dicot	Nicotiana tabacum	dicot	No	none	2-10d	soil
34	Pushp Sheel Shukla,et al.2015	SbMYB15	1	CaMV 35S	Salicornia brachiata	dicot	Nicotiana tabacum	dicot	No	none	2-10d	soil
35	Pushp Sheel Shukla,et al.2015	SbMYB15	1	CaMV 35S	Salicornia brachiata	dicot	Nicotiana tabacum	dicot	No	none	2-10d	soil
36	Pushp Sheel Shukla,et al.2015	SbMYB15	1	CaMV 35S	Salicornia brachiata	dicot	Nicotiana tabacum	dicot	No	none	11-20d	soil
37	Pushp Sheel Shukla,et al.2015	SbMYB15	1	CaMV 35S	Salicornia brachiata	dicot	Nicotiana tabacum	dicot	No	0	11-20d	soil
38	Linjie Qi,et al.2015	SbMYB2	1	CaMV 35S	Scutellaria baicalensis	monocot	Nicotiana tabacum	dicot	No	none	2-10d	medium													0.230769	10	0.228571	10	0.00956945	0.2
39	Linjie Qi,et al.2015	SbMYB7	1	CaMV 35S	Scutellaria baicalensis	monocot	Nicotiana tabacum	dicot	No	none	2-10d	medium													0.27907	10	0.228571	10	0.199613	0.2
40	Linjie Qi,et al.2015	SbMYB2	1	CaMV 35S	Scutellaria baicalensis	monocot	Nicotiana tabacum	dicot	No	none	2-10d	medium													0.367521	10	0.485714	10	-0.278839	0.2
41	Linjie Qi,et al.2015	SbMYB7	1	CaMV 35S	Scutellaria baicalensis	monocot	Nicotiana tabacum	dicot	No	none	2-10d	medium													0.612403	10	0.485714	10	0.23177	0.2
42	Linjie Qi,et al.2015	SbMYB2	1	CaMV 35S	Scutellaria baicalensis	monocot	Nicotiana tabacum	dicot	No	none	2-10d	medium													0.820513	10	0.990476	10	-0.188256	0.2
43	Linjie Qi,et al.2015	SbMYB7	1	CaMV 35S	Scutellaria baicalensis	monocot	Nicotiana tabacum	dicot	No	none	2-10d	medium													0.782946	10	0.990476	10	-0.235122	0.2
44	Linjie Qi,et al.2015	SbMYB2	1	CaMV 35S	Scutellaria baicalensis	monocot	Nicotiana tabacum	dicot	No	none	2-10d	medium
45	Linjie Qi,et al.2015	SbMYB7	1	CaMV 35S	Scutellaria baicalensis	monocot	Nicotiana tabacum	dicot	No	none	2-10d	medium
46	Linjie Qi,et al.2015	SbMYB2	1	CaMV 35S	Scutellaria baicalensis	monocot	Nicotiana tabacum	dicot	No	none	2-10d	medium
47	Linjie Qi,et al.2015	SbMYB7	1	CaMV 35S	Scutellaria baicalensis	monocot	Nicotiana tabacum	dicot	No	none	2-10d	medium
48	Linjie Qi,et al.2015	SbMYB2	1	CaMV 35S	Scutellaria baicalensis	monocot	Nicotiana tabacum	dicot	No	none	2-10d	medium
49	Linjie Qi,et al.2015	SbMYB7	1	CaMV 35S	Scutellaria baicalensis	monocot	Nicotiana tabacum	dicot	No	none	2-10d	medium
50	Rongkai Wang	MdSIMYB1	1	CaMV 35S	Malus domesica Borkh	dicot	Nicotiana benthamiana	dicot	No	none	＜2d	medium							0	50	0	50	0	0.04
51	Rongkai Wang	MdSIMYB1	1	CaMV 35S	Malus domesica Borkh	dicot	Nicotiana benthamiana	dicot	No	none	2-10d	medium							0.775194	50	0.775194	50	0	0.04
52	Rongkai Wang	MdSIMYB1	1	CaMV 35S	Malus domesica Borkh	dicot	Nicotiana benthamiana	dicot	No	none	2-10d	medium							12.4031	50	5.42636	50	0.826679	0.04
53	Rongkai Wang	MdSIMYB1	1	CaMV 35S	Malus domesica Borkh	dicot	Nicotiana benthamiana	dicot	No	none	2-10d	medium							34.8837	50	13.9535	50	0.916291	0.04
54	Rongkai Wang	MdSIMYB1	1	CaMV 35S	Malus domesica Borkh	dicot	Nicotiana benthamiana	dicot	No	none	2-10d	medium							50.1292	50	28.6822	50	0.558328	0.04
55	Rongkai Wang	MdSIMYB1	1	CaMV 35S	Malus domesica Borkh	dicot	Nicotiana benthamiana	dicot	No	none	2-10d	medium							72.093	50	37.2093	50	0.661398	0.04
56	Rongkai Wang	MdSIMYB1	1	CaMV 35S	Malus domesica Borkh	dicot	Nicotiana benthamiana	dicot	No	none	2-10d	medium							100	50	70.5426	50	0.348953	0.04
57	Rongkai Wang	MdSIMYB1	1	CaMV 35S	Malus domesica Borkh	dicot	Nicotiana benthamiana	dicot	No	none	2-10d	medium							100	50	100	50	0	0.04
58	Liqin Cheng,et al.2013	LcMYB1	1	CaMV 35S	Leymus chinensis	monocot	Arabidopsis thaliana	dicot	No	none	＞20d	medium	99.5122	3	99.5122	3	0	0.666667
59	Liqin Cheng,et al.2013	LcMYB1	1	CaMV 35S	Leymus chinensis	monocot	Arabidopsis thaliana	dicot	No	none	2-10d	medium																															3.75796	3	2.86624	3	0.270875	0.666667
60	Hye-Jung Lee,et al.2012	OsMLD	1	CaMV 35S	Oryza sativa	monocot	Oryza sativa	monocot	Yes	none	2-10d	medium																															0.425856	3	0.425856	3	0	0.666667	27.1346
[truncated: 53 more columns]

## Sheet: Figure 7-9 change percentage
Figure 7					Figure 8					Figure 9
Germination		Point estimate	changes%		Root length		Point estimate	changes%		Fresh weight		Point estimate	changes%
Treatment media	Other	0.478	61.2845		Donor genus	Fraxinus	0.563	75.5932		Donor genus	Scutellaria	0.725	106.473
	Liquid	0.485	62.4175			Scutellaria	0.52	68.2028			Other	-0.001	-0.09995
	Solid	0.376	45.6447			Other	0.041	4.18521		Recipient genus	Nicotiana tabacum	0.725	106.473
Donor genus	Malus domesica	0.478	61.2845		Donor type	Monocot	0.531	70.0632			Other	-0.001	-0.09995
	Oryza sativa	0.378	45.9363			Dicot	0.036	3.66558		Donor and recipient genus same	Yes	-0.001	-0.09995
	Other	0.407	50.2304		Recipient genus	Arabidopsis thaliana	-0.021	-2.0781			No	0.725	106.473
Donor type	Dicot	0.448	56.5179			Nicotiana tabacum	0.53	69.8932
	Monocot	0.378	45.9363		Stress severity	High	0.965	162.479
Recipient genus	Arabidopsis thaliana	0.394	48.2901			Medium	0.295	34.3126
	Nicotiana	0.478	61.2845			Low	0.32	37.7128
Donor and recipient genus same	No	0.441	55.4261		Stress time	2-10d	0.525	69.0459
	yes	0.107	11.2934			11-20d	-0.278	-24.2703
Stress severity	Low	0.422	52.5009			＞20d	0.578	78.247
	Medium	0.45	56.8312
